# Supplementary material for: Epitranscriptomic Reprogramming Is Required to Prevent Stress and Damage from Acetaminophen
Source: MDPI journal article supplement (doi:10.3390/genes13030421), 2022-02-25

## Supplemental Tables

**Supplemental Table S1A. Measured epitranscriptomic marks in mouse liver tissue after APAP (6 hours).** Epitranscriptomic mark changes and comparisons between WT and *Alkbh8*<sup>Def</sup> liver tissue post 6-hour exposure to 600 mg/kg of APAP comparisons between WT and *Alkbh8*<sup>Def</sup> liver tissue post 6-hour exposure to 600 mg/kg of APAP with reported statistical significance of biological replicates (N = 3) measured by an unpaired t-test.

| tRNA Modification                  | <i>Alkbh8</i> <sup>Def</sup> Saline vs. WT Saline, Log <sub>2</sub> Fold Change | WT APAP vs. WT Saline, Log <sub>2</sub> Fold Change | <i>Alkbh8</i> <sup>Def</sup> APAP vs. WT Saline, Log <sub>2</sub> Fold Change | <i>Alkbh8</i> <sup>Def</sup> APAP vs. WT APAP, Log <sub>2</sub> Fold Change | <i>Alkbh8</i> <sup>Def</sup> APAP vs. <i>Alkbh8</i> <sup>Def</sup> Saline, Log <sub>2</sub> Fold Change | WT APAP vs. WT Saline p-Value | <i>Alkbh8</i> <sup>Def</sup> Saline vs WT Saline p-Value | <i>Alkbh8</i> <sup>Def</sup> APAP vs. WT APAP p-Value | <i>Alkbh8</i> <sup>Def</sup> APAP vs. <i>Alkbh8</i> <sup>Def</sup> Saline p-Value |
|------------------------------------|---------------------------------------------------------------------------------|-----------------------------------------------------|-------------------------------------------------------------------------------|-----------------------------------------------------------------------------|---------------------------------------------------------------------------------------------------------|-------------------------------|----------------------------------------------------------|-------------------------------------------------------|-----------------------------------------------------------------------------------|
| A                                  | 0.0                                                                             | -0.1                                                | -0.3                                                                          | -0.2                                                                        | -0.28                                                                                                   | 0.0340                        | 0.0470                                                   | 0.0460                                                | 0.0037                                                                            |
| Am                                 | 1.6                                                                             | 0.2                                                 | -1.5                                                                          | -1.7                                                                        | -3.08                                                                                                   | 0.0700                        | 0.0001                                                   | 0.0022                                                | 0.000004                                                                          |
| C                                  | 0.2                                                                             | 0.1                                                 | -0.5                                                                          | -0.7                                                                        | -0.67                                                                                                   | 0.0920                        | 0.0005                                                   | 0.0180                                                | 0.0160                                                                            |
| Cm                                 | 0.6                                                                             | 1.2                                                 | -0.4                                                                          | -1.5                                                                        | -0.91                                                                                                   | 0.3010                        | 0.0001                                                   | 0.0100                                                | 0.0020                                                                            |
| G                                  | 0.1                                                                             | 0.1                                                 | -0.6                                                                          | -0.6                                                                        | -0.63                                                                                                   | 0.0680                        | 0.0011                                                   | 0.0084                                                | 0.0088                                                                            |
| Gm                                 | 0.3                                                                             | 0.8                                                 | -0.7                                                                          | -1.5                                                                        | -1.00                                                                                                   | 0.3210                        | 0.0032                                                   | 0.0042                                                | 0.0006                                                                            |
| I                                  | 0.3                                                                             | 0.7                                                 | -0.5                                                                          | -1.1                                                                        | -0.77                                                                                                   | 0.2840                        | 0.0001                                                   | 0.0024                                                | 0.0011                                                                            |
| T                                  | -6.7                                                                            | -1.2                                                | -7.7                                                                          | -6.5                                                                        | -1.02                                                                                                   | 0.0000                        | 0.0003                                                   | 0.0440                                                | 0.1250                                                                            |
| U                                  | -0.1                                                                            | -0.7                                                | -3.8                                                                          | -3.1                                                                        | -3.65                                                                                                   | 0.3060                        | 0.2180                                                   | 0.0034                                                | 0.00001                                                                           |
| Um                                 | 0.9                                                                             | 1.4                                                 | 0.6                                                                           | -0.8                                                                        | -0.30                                                                                                   | 0.3440                        | 0.1110                                                   | 0.3100                                                | 0.3350                                                                            |
| Y                                  | 0.1                                                                             | 0.4                                                 | -0.4                                                                          | -0.8                                                                        | -0.52                                                                                                   | 0.0046                        | 0.2080                                                   | 0.0090                                                | 0.0740                                                                            |
| ac <sup>4</sup> C                  | -0.1                                                                            | 0.1                                                 | 0.2                                                                           | 0.1                                                                         | 0.22                                                                                                    | 0.0750                        | 0.4190                                                   | 0.0036                                                | 0.1100                                                                            |
| cmnm <sup>5</sup> U                | 0.7                                                                             | 0.5                                                 | -0.2                                                                          | -0.7                                                                        | -0.86                                                                                                   | 0.1700                        | 0.0240                                                   | 0.0620                                                | 0.0110                                                                            |
| dA                                 | -4.6                                                                            | -0.9                                                | -5.5                                                                          | -4.6                                                                        | -0.90                                                                                                   | 2.10E-13                      | 0.0000004                                                | 0.0210                                                | 0.1240                                                                            |
| dG                                 | -4.8                                                                            | -0.6                                                | -5.5                                                                          | -5.0                                                                        | -0.76                                                                                                   | 0.0000001                     | 0.00002                                                  | 0.0240                                                | 0.1340                                                                            |
| f <sup>5</sup> C                   | -0.2                                                                            | 1.0                                                 | -0.6                                                                          | -1.6                                                                        | -0.40                                                                                                   | 0.0190                        | 0.3690                                                   | 0.0190                                                | 0.3130                                                                            |
| ho <sup>5</sup> U                  | 0.0                                                                             | 0.7                                                 | -0.6                                                                          | -1.4                                                                        | -0.67                                                                                                   | 0.0110                        | 0.4720                                                   | 0.0230                                                | 0.1750                                                                            |
| i <sup>6</sup> A                   | -0.2                                                                            | 1.1                                                 | -0.5                                                                          | -1.6                                                                        | -0.36                                                                                                   | 0.0001                        | 0.2530                                                   | 0.0055                                                | 0.1870                                                                            |
| m <sup>1</sup> A                   | -0.1                                                                            | 0.7                                                 | -0.4                                                                          | -1.2                                                                        | -0.38                                                                                                   | 0.0001                        | 0.4010                                                   | 0.0053                                                | 0.1710                                                                            |
| m <sup>1</sup> G                   | -0.1                                                                            | 0.9                                                 | -0.4                                                                          | -1.3                                                                        | -0.38                                                                                                   | 0.0001                        | 0.4000                                                   | 0.0060                                                | 0.1730                                                                            |
| m <sup>1</sup> I                   | -0.1                                                                            | 0.9                                                 | -0.4                                                                          | -1.3                                                                        | -0.31                                                                                                   | 0.0001                        | 0.3120                                                   | 0.0045                                                | 0.2140                                                                            |
| m <sup>1</sup> acp <sup>3</sup> ψU | 0.2                                                                             | -0.1                                                | 0.4                                                                           | 0.4                                                                         | 0.17                                                                                                    | 0.0350                        | 0.2690                                                   | 0.0490                                                | 0.1690                                                                            |
| m <sup>22</sup> G                  | -0.1                                                                            | 1.2                                                 | -0.4                                                                          | -1.6                                                                        | -0.34                                                                                                   | 0.0036                        | 0.4110                                                   | 0.0095                                                | 0.1890                                                                            |
| m <sup>2</sup> G                   | -0.1                                                                            | 0.8                                                 | -0.5                                                                          | -1.3                                                                        | -0.39                                                                                                   | 0.0001                        | 0.3830                                                   | 0.0058                                                | 0.1660                                                                            |
| m <sup>3</sup> C                   | 0.0                                                                             | 0.7                                                 | -0.3                                                                          | -0.9                                                                        | -0.28                                                                                                   | 0.0001                        | 0.4760                                                   | 0.0100                                                | 0.2390                                                                            |
| m <sup>5</sup> C                   | -0.2                                                                            | 0.1                                                 | -0.5                                                                          | -0.6                                                                        | -0.26                                                                                                   | 0.0002                        | 0.1770                                                   | 0.0340                                                | 0.2620                                                                            |
| m <sup>5</sup> U                   | -0.1                                                                            | 0.8                                                 | -0.5                                                                          | -1.3                                                                        | -0.44                                                                                                   | 0.0001                        | 0.3940                                                   | 0.0042                                                | 0.1340                                                                            |
| m <sup>7</sup> G                   | 0.0                                                                             | 0.9                                                 | -0.5                                                                          | -1.4                                                                        | -0.46                                                                                                   | 0.0003                        | 0.4990                                                   | 0.0046                                                | 0.1220                                                                            |
| mcm <sup>5</sup> U                 | -0.1                                                                            | 3.5                                                 | -0.2                                                                          | -3.7                                                                        | -0.04                                                                                                   | 0.0370                        | 0.4310                                                   | 0.0056                                                | 0.4820                                                                            |
| mcm <sup>5</sup> s <sup>2</sup> U  | -0.1                                                                            | 1.0                                                 | -0.5                                                                          | -1.6                                                                        | -0.41                                                                                                   | 0.0001                        | 0.2990                                                   | 0.0066                                                | 0.1500                                                                            |
| mn <sup>5</sup> U                  | 0.4                                                                             | 4.7                                                 | -1.7                                                                          | -6.4                                                                        | -2.14                                                                                                   | 0.0390                        | 0.0150                                                   | 0.0290                                                | 0.000001                                                                          |

|                                   |     |     |      |      |       |        |         |        |        |
|-----------------------------------|-----|-----|------|------|-------|--------|---------|--------|--------|
| $\text{mm}^5 \text{s}^2 \text{U}$ | 0.5 | 3.1 | -0.1 | -3.2 | -0.62 | 0.3430 | 0.0440  | 0.0290 | 0.0500 |
| $\text{m}^5 \text{U}$             | 0.9 | 2.3 | -0.5 | -2.7 | -1.41 | 0.2330 | 0.00004 | 0.0130 | 0.0001 |
| $\text{s}^2 \text{C}$             | 0.0 | 0.4 | 0.0  | -0.3 | 0.04  | 0.1170 | 0.4970  | 0.1220 | 0.4510 |
| $\text{s}^2 \text{U}$             | 0.8 | 1.6 | -0.5 | -2.1 | -1.33 | 0.4040 | 0.0001  | 0.0067 | 0.0002 |
| $\text{s}^2 \text{m}^5 \text{U}$  | 0.9 | 0.6 | 0.4  | -0.2 | -0.44 | 0.3310 | 0.0260  | 0.2360 | 0.1030 |
| $\text{s}^4 \text{U}$             | 1.4 | 1.8 | -0.3 | -2.2 | -1.74 | 0.0007 | 0.00002 | 0.0180 | 0.0001 |

**Supplemental Table S1B. Measured tRNA modifications in mouse liver tissue after daily dose of APAP (4 Days).** Calculations for each epitranscriptomic mark and comparisons between WT and *Alkbh8*<sup>Def</sup> liver tissue post daily 4 Day exposure to 600 mg/kg of APAP.

| tRNA Modification                  | <i>Alkbh8</i> <sup>Def</sup> Saline vs. WT Saline, Log <sub>2</sub> Fold Change | WT APAP vs. WT Saline, Log <sub>2</sub> Fold Change | <i>Alkbh8</i> <sup>Def</sup> APAP vs. WT Saline, Log <sub>2</sub> Fold Change | <i>Alkbh8</i> <sup>Def</sup> APAP vs. WT APAP, Log <sub>2</sub> Fold Change | <i>Alkbh8</i> <sup>Def</sup> APAP vs. <i>Alkbh8</i> <sup>Def</sup> Saline, Log <sub>2</sub> Fold Change | WT APAP vs. WT Saline, p-Value | <i>Alkbh8</i> <sup>Def</sup> Saline vs. WT Saline, p-Value | <i>Alkbh8</i> <sup>Def</sup> APAP vs. WT APAP, p-Value | <i>Alkbh8</i> <sup>Def</sup> APAP vs. <i>Alkbh8</i> <sup>Def</sup> Saline, p-Value |
|------------------------------------|---------------------------------------------------------------------------------|-----------------------------------------------------|-------------------------------------------------------------------------------|-----------------------------------------------------------------------------|---------------------------------------------------------------------------------------------------------|--------------------------------|------------------------------------------------------------|--------------------------------------------------------|------------------------------------------------------------------------------------|
| A                                  | 3.2E-03                                                                         | -0.23                                               | -0.32                                                                         | -8.7E-02                                                                    | -0.32                                                                                                   | 3.8E-04                        | 0.46                                                       | 0.11                                                   | 1.7E-06                                                                            |
| Am                                 | -0.90                                                                           | 0.63                                                | -0.41                                                                         | -1.04                                                                       | 0.49                                                                                                    | 0.34                           | 0.27                                                       | 0.27                                                   | 0.38                                                                               |
| C                                  | -0.10                                                                           | 0.10                                                | -4.8E-02                                                                      | -0.15                                                                       | 5.5E-02                                                                                                 | 0.20                           | 0.17                                                       | 0.05                                                   | 0.18                                                                               |
| G                                  | -3.6E-02                                                                        | 2.2E-02                                             | -8.4E-02                                                                      | -0.11                                                                       | -4.8E-02                                                                                                | 0.33                           | 0.23                                                       | 5.4E-03                                                | 7.3E-02                                                                            |
| I                                  | -0.12                                                                           | 0.19                                                | 1.6E-02                                                                       | -0.17                                                                       | 0.14                                                                                                    | 0.20                           | 0.28                                                       | 0.13                                                   | 0.12                                                                               |
| T                                  | -6.0E-03                                                                        | -1.18                                               | 0.18                                                                          | 1.35                                                                        | 0.18                                                                                                    | 9.5E-02                        | 0.50                                                       | 3.8E-02                                                | 0.35                                                                               |
| U                                  | 0.20                                                                            | 1.26                                                | 1.50                                                                          | 0.24                                                                        | 1.30                                                                                                    | 2.3E-04                        | 0.21                                                       | 0.13                                                   | 5.3E-06                                                                            |
| Um                                 | -1.47                                                                           | -4.21                                               | -4.12                                                                         | 8.7E-02                                                                     | -2.66                                                                                                   | 9.9E-05                        | 8.4E-03                                                    | 0.36                                                   | 2.0E-02                                                                            |
| Y                                  | -0.12                                                                           | 0.12                                                | -0.13                                                                         | -0.25                                                                       | -6.9E-03                                                                                                | 0.27                           | 0.27                                                       | 2.5E-02                                                | 0.46                                                                               |
| dA                                 | 0.24                                                                            | 1.04                                                | 0.60                                                                          | -0.44                                                                       | 0.35                                                                                                    | 1.3E-07                        | 0.23                                                       | 6.6E-03                                                | 0.14                                                                               |
| dG                                 | 0.40                                                                            | 0.82                                                | 0.71                                                                          | -0.11                                                                       | 0.31                                                                                                    | 2.0E-06                        | 4.7E-02                                                    | 0.22                                                   | 7.3E-02                                                                            |
| f <sup>5</sup> C                   | -0.25                                                                           | 0.28                                                | -0.08                                                                         | -0.36                                                                       | 0.17                                                                                                    | 0.18                           | 0.21                                                       | 6.0E-02                                                | 0.18                                                                               |
| ho <sup>5</sup> U                  | -0.42                                                                           | -0.95                                               | -0.14                                                                         | 0.80                                                                        | 0.28                                                                                                    | 6.1E-02                        | 0.17                                                       | 0.10                                                   | 0.26                                                                               |
| i <sup>6</sup> A                   | 0.15                                                                            | 0.03                                                | -0.10                                                                         | -0.13                                                                       | -0.25                                                                                                   | 0.42                           | 0.12                                                       | 1.5E-02                                                | 8.5E-06                                                                            |
| m <sup>1</sup> A                   | 0.22                                                                            | 0.25                                                | -0.04                                                                         | -0.29                                                                       | -0.26                                                                                                   | 1.0E-02                        | 1.5E-02                                                    | 6.7E-05                                                | 3.0E-05                                                                            |
| m <sup>1</sup> G                   | -5.9E-02                                                                        | 7.9E-02                                             | 2.7E-02                                                                       | -5.2E-02                                                                    | 8.6E-02                                                                                                 | 0.26                           | 0.28                                                       | 0.31                                                   | 0.14                                                                               |
| m <sup>1</sup> I                   | -5.42                                                                           | -5.52                                               | -5.64                                                                         | -0.12                                                                       | -0.21                                                                                                   | 0.17                           | 0.17                                                       | 0.43                                                   | 0.38                                                                               |
| m <sup>1</sup> acp <sup>3</sup> ΨU | -1.41                                                                           | 0.66                                                | -0.22                                                                         | -0.87                                                                       | 1.19                                                                                                    | 7.9E-02                        | 6.4E-02                                                    | 2.3E-02                                                | 8.2E-02                                                                            |
| m <sup>2</sup> 2G                  | 0.92                                                                            | 1.50                                                | 1.51                                                                          | 1.4E-02                                                                     | 0.59                                                                                                    | 1.1E-12                        | 7.1E-03                                                    | 0.28                                                   | 3.6E-03                                                                            |
| m <sup>2</sup> G                   | 1.90                                                                            | 1.58                                                | 1.14                                                                          | -0.44                                                                       | -0.76                                                                                                   | 3.8E-02                        | 3.7E-02                                                    | 0.28                                                   | 0.18                                                                               |
| m <sup>3</sup> C                   | 0.11                                                                            | 0.12                                                | -8.1E-02                                                                      | -0.20                                                                       | -0.19                                                                                                   | 0.15                           | 0.15                                                       | 4.8E-04                                                | 6.6E-05                                                                            |
| m <sup>5</sup> C                   | 0.08                                                                            | 0.09                                                | -0.07                                                                         | -0.15                                                                       | -0.15                                                                                                   | 0.23                           | 0.23                                                       | 1.6E-02                                                | 4.7E-03                                                                            |
| m <sup>5</sup> U                   | 8.9E-02                                                                         | -4.3E-02                                            | -0.19                                                                         | -0.15                                                                       | -0.28                                                                                                   | 0.29                           | 0.10                                                       | 3.6E-03                                                | 9.8E-07                                                                            |
| m <sup>6</sup> A                   | -0.96                                                                           | 0.24                                                | -0.36                                                                         | -0.59                                                                       | 0.60                                                                                                    | 0.31                           | 5.4E-02                                                    | 6.5E-02                                                | 4.7E-02                                                                            |
| mcm <sup>5</sup> U                 | -1.36                                                                           | -1.08                                               | -0.94                                                                         | 0.13                                                                        | 0.41                                                                                                    | 0.10                           | 7.5E-02                                                    | 0.41                                                   | 0.26                                                                               |
| mcm <sup>5</sup> s <sup>2</sup> U  | 0.12                                                                            | 0.16                                                | -0.05                                                                         | -0.21                                                                       | -0.17                                                                                                   | 9.4E-02                        | 0.16                                                       | 1.0E-03                                                | 6.0E-03                                                                            |
| mn <sup>5</sup> U                  | -0.11                                                                           | 0.28                                                | -8.1E-02                                                                      | -0.36                                                                       | 3.4E-02                                                                                                 | 0.13                           | 0.29                                                       | 4.1E-02                                                | 0.38                                                                               |
| mn <sup>5</sup> s <sup>2</sup> U   | 9.1E-02                                                                         | 7.2E-04                                             | -0.37                                                                         | -0.37                                                                       | -0.46                                                                                                   | 0.50                           | 0.20                                                       | 1.1E-03                                                | 3.6E-05                                                                            |
| mo <sup>5</sup> U                  | -0.36                                                                           | 0.49                                                | 0.25                                                                          | -0.24                                                                       | 0.61                                                                                                    | 0.17                           | 0.27                                                       | 0.20                                                   | 8.1E-03                                                                            |
| s <sup>2</sup> C                   | 0.08                                                                            | -0.08                                               | 5.6E-02                                                                       | 0.14                                                                        | -2.9E-02                                                                                                | 0.17                           | 0.20                                                       | 3.9E-02                                                | 0.38                                                                               |
| s <sup>2</sup> U                   | -2.32                                                                           | -1.11                                               | 0.99                                                                          | 2.10                                                                        | 3.30                                                                                                    | 5.3E-02                        | 1.5E-03                                                    | 9.3E-03                                                | 2.2E-03                                                                            |
| s <sup>2</sup> mo <sup>5</sup> U   | -0.62                                                                           | -0.61                                               | 1.2E-03                                                                       | 0.61                                                                        | 0.63                                                                                                    | 0.16                           | 0.16                                                       | 0.17                                                   | 0.17                                                                               |
| s <sup>4</sup> U                   | -0.24                                                                           | 0.29                                                | 6.1E-03                                                                       | -0.28                                                                       | 0.24                                                                                                    | 0.14                           | 0.19                                                       | 7.6E-02                                                | 5.6E-02                                                                            |

**Supplemental Table S2. WES raw data for all proteins analyzed in 6 hour APAP exposure experiment.** Protein quantitation data was normalized to housekeeping protein, GAPDH, and normalized corrected area analysis setting was set to 100 on ProteinSimple Compass Software.

| Sample                                     | Primary Antibody | Capillary | Peak | Name  | Position | MW (kDa) | Height   | Area    | % Area | Corr. Area | Width | S/N     | Baseline |
|--------------------------------------------|------------------|-----------|------|-------|----------|----------|----------|---------|--------|------------|-------|---------|----------|
| WT521Saline                                | GPX1/GAPH        | C1:3      | 1    | GPX1  | 449      | 28       | 50596.4  | 540734  | 27.9   | 38.6       | 10    | 1017.5  | 607.3    |
| WT521Saline                                | GPX1/GAPH        | C1:3      | 2    | GAPDH | 494      | 39       | 157614.7 | 1400424 | 72.1   | 100        | 8.3   | 3291.7  | 707.3    |
| WT522Saline                                | GPX1/GAPH        | C1:5      | 1    | GPX1  | 443      | 28       | 77534.2  | 673172  | 25.8   | 34.8       | 8.2   | 1331.1  | 900.1    |
| WT522Saline                                | GPX1/GAPH        | C1:5      | 2    | GAPDH | 489      | 39       | 249773.5 | 1933917 | 74.2   | 100        | 7.3   | 4359.3  | 1097.7   |
| WT526Saline                                | GPX1/GAPH        | C1:6      | 1    | GPX1  | 442      | 28       | 110140.8 | 930117  | 25.5   | 34.2       | 7.9   | 2434.5  | 649.1    |
| WT526Saline                                | GPX1/GAPH        | C1:6      | 2    | GAPDH | 487      | 38       | 354684.5 | 2718060 | 74.5   | 100        | 7.2   | 7913.4  | 727.1    |
| <i>Alkbh8</i> <sup>Def</sup> 549-/- Saline | GPX1/GAPH        | C1:4      | 1    | GPX1  | 443      | 28       | 50636.3  | 483065  | 18.1   | 22         | 9     | 1011.6  | 553.6    |
| <i>Alkbh8</i> <sup>Def</sup> 549-/- Saline | GPX1/GAPH        | C1:4      | 2    | GAPDH | 489      | 39       | 266771.8 | 2190817 | 81.9   | 100        | 7.7   | 5488.5  | 633.9    |
| <i>Alkbh8</i> <sup>Def</sup> 550-/- Saline | GPX1/GAPH        | C1:9      | 1    | GPX1  | 442      | 28       | 83423.8  | 696101  | 23.9   | 31.4       | 7.8   | 1984.4  | 603.8    |
| <i>Alkbh8</i> <sup>Def</sup> 550-/- Saline | GPX1/GAPH        | C1:8      | 3    | GAPDH | 488      | 39       | 266838.5 | 1939870 | 76.3   | 100        | 6.8   | 7070.2  | 719.5    |
| <i>Alkbh8</i> <sup>Def</sup> 551-/- Saline | GPX1/GAPH        | C1:8      | 2    | GPX1  | 442      | 28       | 70059.8  | 601533  | 23.7   | 31         | 8.1   | 1866.6  | 655.8    |
| <i>Alkbh8</i> <sup>Def</sup> 551-/- Saline | GPX1/GAPH        | C1:9      | 2    | GAPDH | 488      | 39       | 307847.5 | 2214587 | 76.1   | 100        | 6.8   | 7342.2  | 666.9    |
| WT525 APAP                                 | GPX1/GAPH        | C1:7      | 1    | GPX1  | 444      | 28       | 123456.2 | 1025526 | 29.6   | 42         | 7.8   | 2493.1  | 732.5    |
| WT525 APAP                                 | GPX1/GAPH        | C1:7      | 2    | GAPDH | 489      | 39       | 308642.7 | 2443044 | 70.4   | 100        | 7.4   | 6243.6  | 850.5    |
| WT527 APAP                                 | GPX1/GAPH        | C1:10     | 1    | GPX1  | 448      | 28       | 31985.4  | 320962  | 36.8   | 58.1       | 9.4   | 804.7   | 566.5    |
| WT527 APAP                                 | GPX1/GAPH        | C1:10     | 2    | GAPDH | 495      | 38       | 74816.9  | 552157  | 63.2   | 100        | 6.9   | 1911.3  | 655.6    |
| WT528 APAP                                 | GPX1/GAPH        | C1:11     | 1    | GPX1  | 446      | 28       | 114804.1 | 1024475 | 28.3   | 39.4       | 8.4   | 2856.7  | 738.4    |
| WT528 APAP                                 | GPX1/GAPH        | C1:11     | 2    | GAPDH | 491      | 38       | 317967.8 | 2601984 | 71.7   | 100        | 7.7   | 8071.3  | 909      |
| <i>Alkbh8</i> <sup>Def</sup> 546-/- APAP   | GPX1/GAPH        | C1:2      | 1    | GPX1  | 446      | 28       | 62161.4  | 535190  | 20.2   | 25.3       | 8.1   | 1418.1  | 588.8    |
| <i>Alkbh8</i> <sup>Def</sup> 546-/- APAP   | GPX1/GAPH        | C1:2      | 2    | GAPDH | 492      | 39       | 276573.9 | 2117178 | 79.8   | 100        | 7.2   | 6386.6  | 698      |
| <i>Alkbh8</i> <sup>Def</sup> 547-/- APAP   | GPX1/GAPH        | C1:4      | 1    | GPX1  | 443      | 28       | 50636.3  | 483065  | 18.1   | 22         | 9     | 1011.6  | 553.6    |
| <i>Alkbh8</i> <sup>Def</sup> 547-/- APAP   | GPX1/GAPH        | C1:4      | 2    | GAPDH | 489      | 39       | 266771.8 | 2190817 | 81.9   | 100        | 7.7   | 5488.5  | 633.9    |
| <i>Alkbh8</i> <sup>Def</sup> 548-/- APAP   | GPX1/GAPH        | C1:13     | 1    | GPX1  | 442      | 28       | 129755.5 | 1004248 | 21.6   | 27.5       | 7.3   | 2758.6  | 713.9    |
| <i>Alkbh8</i> <sup>Def</sup> 548-/- APAP   | GPX1/GAPH        | C1:13     | 2    | GAPDH | 487      | 38       | 494639.9 | 3647564 | 78.4   | 100        | 6.9   | 10889.2 | 795.1    |
| WT521Saline                                | GPX3/GAPDH       | C1:14     | 1    | GPX3  | 447      | 29       | 871.7    | 7367    | 0.2    | 0.2        | 7.9   | 17.1    | 497.4    |
| WT521Saline                                | GPX3/GAPDH       | C1:14     | 2    | GAPDH | 493      | 39       | 615300.4 | 4344585 | 99.8   | 100        | 6.6   | 15282.2 | 566.1    |
| WT522Saline                                | GPX3/GAPDH       | C1:15     | 1    | GPX3  | 451      | 29       | 750.6    | 8679    | 0.7    | 0.7        | 10.9  | 15.8    | 581.9    |
| WT522Saline                                | GPX3/GAPDH       | C1:15     | 2    | GAPDH | 496      | 39       | 158649.9 | 1256936 | 99.3   | 100        | 7.4   | 3738    | 683.4    |
| WT526Saline                                | GPX3/GAPDH       | C1:16     | 1    | GPX3  | 448      | 28       | 736.5    | 7740    | 0.4    | 0.4        | 9.9   | 9.8     | 804.4    |
| WT526Saline                                | GPX3/GAPDH       | C1:16     | 2    | GAPDH | 492      | 39       | 260322   | 2027896 | 99.6   | 100        | 7.3   | 4312.3  | 945      |
| <i>Alkbh8</i> <sup>Def</sup> 549-/- Saline | GPX3/GAPDH       | C1:17     | 1    | GPX3  | 447      | 28       | 1032.6   | 9308    | 0.5    | 0.5        | 8.5   | 20.7    | 686.2    |
| <i>Alkbh8</i> <sup>Def</sup> 549-/- Saline | GPX3/GAPDH       | C1:17     | 2    | GAPDH | 492      | 39       | 245403.4 | 1823891 | 99.5   | 100        | 7     | 5113.5  | 816.7    |
| <i>Alkbh8</i> <sup>Def</sup> 550-/- Saline | GPX3/GAPDH       | C1:18     | 1    | GPX3  | 447      | 28       | 2341.4   | 18086   | 0.6    | 0.6        | 7.3   | 40      | 537      |
| <i>Alkbh8</i> <sup>Def</sup> 550-/- Saline | GPX3/GAPDH       | C1:18     | 2    | GAPDH | 491      | 39       | 397971.1 | 3021578 | 99.4   | 100        | 7.1   | 8563.2  | 610.9    |
| <i>Alkbh8</i> <sup>Def</sup> 551-/- Saline | GPX3/GAPDH       | C1:19     | 1    | GPX3  | 452      | 29       | 3279.2   | 37717   | 1.5    | 1.5        | 10.8  | 102.6   | 279      |
| <i>Alkbh8</i> <sup>Def</sup> 551-/- Saline | GPX3/GAPDH       | C1:19     | 2    | GAPDH | 494      | 39       | 311474.5 | 2482104 | 98.5   | 100        | 7.5   | 10771.4 | 319.9    |
| WT525 APAP                                 | GPX3/GAPDH       | C1:6      | 1    | GPX3  | 419      | 29       | 3139.2   | 41945   | 6.8    | 7.3        | 12.6  | 102.1   | 103.7    |
| WT525 APAP                                 | GPX3/GAPDH       | C1:6      | 2    | GAPDH | 466      | 39       | 77871.3  | 571499  | 100    | 100        | 6.9   | 2617.6  | 118.3    |
| WT527 APAP                                 | GPX3/GAPDH       | C1:22     | 1    | GPX3  | 444      | 29       | 697.1    | 10269   | 3      | 3.1        | 13.8  | 7.6     | 864.2    |

|                                                |                 |       |   |       |     |    |          |         |      |      |      |         |        |
|------------------------------------------------|-----------------|-------|---|-------|-----|----|----------|---------|------|------|------|---------|--------|
| WT527 APAP                                     | GPX3/GAPD<br>H  | C1:22 | 2 | GAPDH | 493 | 38 | 48980.9  | 335193  | 97   | 100  | 6.4  | 876.5   | 974.2  |
| WT528 APAP                                     | GPX3/GAPD<br>H  | C1:7  | 1 | GPX3  | 431 | 29 | 53774.6  | 437505  | 6.3  | 6.8  | 7.6  | 1818.5  | 390.2  |
| WT528 APAP                                     | GPX3/GAPD<br>H  | C1:7  | 2 | GAPDH | 486 | 39 | 951763.4 | 6480246 | 93.7 | 100  | 6.4  | 32570.6 | 427.5  |
| <i>Alkbh8</i> <sup>Def</sup> 546-<br>/- APAP   | GPX3/GAPD<br>H  | C1:23 | 1 | GPX3  | 426 | 25 | 51.8     | 316     | 0    | 0    | 5.7  | 1.2     | 703.5  |
| <i>Alkbh8</i> <sup>Def</sup> 546-<br>/- APAP   | GPX3/GAPD<br>H  | C1:23 | 2 | GAPDH | 491 | 40 | 272274.9 | 1791455 | 100  | 100  | 6.2  | 3617.3  | 899.3  |
| <i>Alkbh8</i> <sup>Def</sup> 547-<br>/- APAP   | GPX3/GAPD<br>H  | C1:24 | 1 | GPX3  | 441 | 28 | 1018.1   | 8948    | 0.4  | 0.4  | 8.3  | 18.2    | 724    |
| <i>Alkbh8</i> <sup>Def</sup> 547-<br>/- APAP   | GPX3/GAPD<br>H  | C1:24 | 2 | GAPDH | 491 | 40 | 332330.9 | 2243327 | 99.6 | 100  | 6.3  | 6317.6  | 859.9  |
| <i>Alkbh8</i> <sup>Def</sup> 548-<br>/- APAP   | GPX3/GAPD<br>H  | C1:25 | 1 | GPX3  | 447 | 29 | 2877.7   | 23376   | 1    | 1    | 7.6  | 57.9    | 812.9  |
| <i>Alkbh8</i> <sup>Def</sup> 548-<br>/- APAP   | GPX3/GAPD<br>H  | C1:25 | 2 | GAPDH | 493 | 39 | 344421.8 | 2297862 | 99   | 100  | 6.3  | 6869.6  | 972.6  |
| WT521Saline                                    | GPX4/GAPD<br>H  | C1:2  | 1 | GPX4  | 429 | 27 | 33883.8  | 292658  | 4.6  | 4.8  | 8.1  | 965.2   | 374    |
| WT521Saline                                    | GPX4/GAPD<br>H  | C1:2  | 2 | GAPDH | 485 | 39 | 868101.8 | 6061692 | 95.4 | 100  | 6.6  | 24993.2 | 510    |
| WT522Saline                                    | GPX4/GAPD<br>H  | C1:3  | 1 | GPX4  | 431 | 27 | 18072.2  | 166662  | 5.2  | 5.5  | 8.7  | 590.6   | 364.6  |
| WT522Saline                                    | GPX4/GAPD<br>H  | C1:3  | 2 | GAPDH | 487 | 38 | 465954.5 | 3055311 | 94.8 | 100  | 6.2  | 14776   | 405    |
| WT526Saline                                    | GPX4/GAPD<br>H  | C1:4  | 1 | GPX4  | 430 | 27 | 25443.4  | 262771  | 4    | 4.2  | 9.7  | 614.5   | 387.5  |
| WT526Saline                                    | GPX4/GAPD<br>H  | C1:4  | 2 | GAPDH | 488 | 40 | 836773   | 6229058 | 96   | 100  | 7    | 20888.3 | 458.4  |
| <i>Alkbh8</i> <sup>Def</sup> 549-<br>/- Saline | GPX4/GAPD<br>H  | C1:7  | 1 | GPX4  | 431 | 27 | 53774.6  | 437505  | 6.3  | 6.8  | 7.6  | 1818.5  | 390.2  |
| <i>Alkbh8</i> <sup>Def</sup> 549-<br>/- Saline | GPX4/GAPD<br>H  | C1:7  | 2 | GAPDH | 486 | 39 | 951763.4 | 6480246 | 93.7 | 100  | 6.4  | 32570.6 | 427.5  |
| <i>Alkbh8</i> <sup>Def</sup> 550-<br>/- Saline | GPX4/GAPD<br>H  | C1:5  | 1 | GPX4  | 429 | 27 | 29111.1  | 246364  | 5    | 5.3  | 8    | 906.6   | 338.9  |
| <i>Alkbh8</i> <sup>Def</sup> 550-<br>/- Saline | GPX4/GAPD<br>H  | C1:5  | 2 | GAPDH | 485 | 40 | 716638   | 4677900 | 95   | 100  | 6.1  | 21789.4 | 403.6  |
| <i>Alkbh8</i> <sup>Def</sup> 551-<br>/- Saline | GPX4/GAPD<br>H  | C1:6  | 1 | GPX4  | 429 | 27 | 35695.8  | 300060  | 5    | 5.2  | 7.9  | 1537.5  | 388.6  |
| <i>Alkbh8</i> <sup>Def</sup> 551-<br>/- Saline | GPX4/GAPD<br>H  | C1:6  | 2 | GAPDH | 486 | 39 | 853578.7 | 5741046 | 95   | 100  | 6.3  | 36274.7 | 464.3  |
| WT525 APAP                                     | GPX4/GAPD<br>H  | C1:11 | 1 | GPX4  | 419 | 28 | 18458.3  | 215257  | 7.4  | 8    | 11   | 419     | 497    |
| WT525 APAP                                     | GPX4/GAPD<br>H  | C1:11 | 2 | GAPDH | 470 | 37 | 368568.3 | 2701793 | 98.5 | 100  | 6.9  | 8941.1  | 553    |
| WT527 APAP                                     | GPX4/GAPD<br>H  | C1:8  | 1 | GPX4  | 430 | 27 | 22958.7  | 203449  | 4.1  | 4.3  | 8.3  | 1071.5  | 404.9  |
| WT527 APAP                                     | GPX4/GAPD<br>H  | C1:8  | 2 | GAPDH | 486 | 40 | 723083.5 | 4737719 | 95.9 | 100  | 6.2  | 33566.9 | 474.3  |
| WT528 APAP                                     | GPX4/GAPD<br>H  | C1:10 | 1 | GPX4  | 415 | 28 | 18810.1  | 237075  | 3.6  | 3.7  | 11.8 | 439     | 613.7  |
| WT528 APAP                                     | GPX4/GAPD<br>H  | C1:10 | 2 | GAPDH | 466 | 39 | 874537.4 | 6363359 | 97.6 | 100  | 6.8  | 23392.2 | 758.7  |
| <i>Alkbh8</i> <sup>Def</sup> 546-<br>/- APAP   | GPX4/GAPD<br>H  | C1:11 | 1 | GPX4  | 432 | 27 | 31485.6  | 279504  | 4.7  | 4.9  | 8.3  | 1148.2  | 336.8  |
| <i>Alkbh8</i> <sup>Def</sup> 546-<br>/- APAP   | GPX4/GAPD<br>H  | C1:11 | 2 | GAPDH | 488 | 40 | 852666.6 | 5659861 | 95.3 | 100  | 6.2  | 31036.4 | 368    |
| <i>Alkbh8</i> <sup>Def</sup> 547-<br>/- APAP   | GPX4/GAPD<br>H  | C1:7  | 1 | GPX4  | 431 | 27 | 53774.6  | 437505  | 6.3  | 6.8  | 7.6  | 1818.5  | 390.2  |
| <i>Alkbh8</i> <sup>Def</sup> 547-<br>/- APAP   | GPX4/GAPD<br>H  | C1:7  | 2 | GAPDH | 486 | 39 | 951763.4 | 6480246 | 93.7 | 100  | 6.4  | 32570.6 | 427.5  |
| <i>Alkbh8</i> <sup>Def</sup> 548-<br>/- APAP   | GPX4/GAPD<br>H  | C1:2  | 1 | GPX4  | 429 | 27 | 33883.8  | 292658  | 4.6  | 4.8  | 8.1  | 965.2   | 374    |
| <i>Alkbh8</i> <sup>Def</sup> 548-<br>/- APAP   | GPX4/GAPD<br>H  | C1:2  | 2 | GAPDH | 485 | 39 | 868101.8 | 6061692 | 95.4 | 100  | 6.6  | 24993.2 | 510    |
| WT521Saline                                    | TRXR1/GAP<br>DH | C1:2  | 3 | TRXR1 | 535 | 56 | 148489.3 | 1486319 | 16.5 | 19.8 | 9.4  | 2398.2  | 1361.4 |
| WT521Saline                                    | TRXR1/GAP<br>DH | C1:2  | 1 | GAPDH | 489 | 40 | 1027393  | 7513838 | 83.5 | 100  | 6.9  | 17210.3 | 1337.6 |
| WT522Saline                                    | TRXR1/GAP<br>DH | C1:3  | 2 | TRXR1 | 535 | 55 | 74666.9  | 815199  | 14.6 | 17.1 | 10.3 | 970.4   | 1711   |
| WT522Saline                                    | TRXR1/GAP<br>DH | C1:3  | 1 | GAPDH | 489 | 40 | 649420.2 | 4766565 | 85.4 | 100  | 6.9  | 8790.1  | 1602.2 |

|                                                |                 |       |   |       |     |    |          |         |      |      |      |         |        |
|------------------------------------------------|-----------------|-------|---|-------|-----|----|----------|---------|------|------|------|---------|--------|
| WT526Saline                                    | TRXR1/GAP<br>DH | C1:4  | 2 | TRXR1 | 534 | 56 | 114324   | 1168248 | 16.5 | 19.8 | 9.6  | 1477.9  | 1379.5 |
| WT526Saline                                    | TRXR1/GAP<br>DH | C1:4  | 1 | GAPDH | 488 | 40 | 810967.8 | 5904967 | 83.5 | 100  | 6.8  | 10743.4 | 1362   |
| <i>Alkbh8</i> <sup>Def</sup> 549-<br>/- Saline | TRXR1/GAP<br>DH | C1:5  | 2 | TRXR1 | 534 | 55 | 99249.2  | 1118277 | 14.9 | 17.5 | 10.6 | 916.2   | 1599.3 |
| <i>Alkbh8</i> <sup>Def</sup> 549-<br>/- Saline | TRXR1/GAP<br>DH | C1:5  | 1 | GAPDH | 488 | 39 | 852572   | 6385236 | 85.1 | 100  | 7    | 8359.5  | 1540.7 |
| <i>Alkbh8</i> <sup>Def</sup> 550-<br>/- Saline | TRXR1/GAP<br>DH | C1:6  | 2 | TRXR1 | 534 | 55 | 118215.5 | 1324038 | 14.5 | 16.9 | 10.5 | 1797.2  | 1762.6 |
| <i>Alkbh8</i> <sup>Def</sup> 550-<br>/- Saline | TRXR1/GAP<br>DH | C1:6  | 1 | GAPDH | 487 | 39 | 1065369  | 7837010 | 85.5 | 100  | 6.9  | 17383.8 | 1631.5 |
| <i>Alkbh8</i> <sup>Def</sup> 551-<br>/- Saline | TRXR1/GAP<br>DH | C1:8  | 2 | TRXR1 | 534 | 55 | 121081.6 | 1312601 | 15.1 | 17.8 | 10.2 | 1329.1  | 1425.5 |
| <i>Alkbh8</i> <sup>Def</sup> 551-<br>/- Saline | TRXR1/GAP<br>DH | C1:9  | 2 | GAPDH | 488 | 39 | 948778.2 | 6728725 | 83.9 | 100  | 6.7  | 15428.6 | 1386.7 |
| WT525 APAP                                     | TRXR1/GAP<br>DH | C1:14 | 4 | TRXR1 | 514 | 55 | 105175.6 | 1248680 | 17.6 | 21.4 | 11.2 | 2167.8  | 1555.3 |
| WT525 APAP                                     | TRXR1/GAP<br>DH | C1:14 | 2 | GAPDH | 467 | 39 | 835816.1 | 5831180 | 100  | 100  | 6.6  | 18620.3 | 1316.2 |
| WT527 APAP                                     | TRXR1/GAP<br>DH | C1:15 | 3 | TRXR1 | 518 | 49 | 34006.6  | 464138  | 15.8 | 18.8 | 12.8 | 502.8   | 1267.2 |
| WT527 APAP                                     | TRXR1/GAP<br>DH | C1:15 | 1 | GAPDH | 471 | 37 | 340991.6 | 2470730 | 100  | 100  | 6.8  | 5721.6  | 1150.3 |
| WT528 APAP                                     | TRXR1/GAP<br>DH | C1:7  | 2 | TRXR1 | 535 | 55 | 155645   | 1793764 | 17.2 | 20.7 | 10.8 | 2525.7  | 1918   |
| WT528 APAP                                     | TRXR1/GAP<br>DH | C1:7  | 1 | GAPDH | 488 | 39 | 1115699  | 8654119 | 82.8 | 100  | 7.3  | 19804.3 | 1771.1 |
| <i>Alkbh8</i> <sup>Def</sup> 546-<br>/- APAP   | TRXR1/GAP<br>DH | C1:9  | 3 | TRXR1 | 533 | 55 | 108093.9 | 1286538 | 16.1 | 19.1 | 11.2 | 1628.7  | 1461.1 |
| <i>Alkbh8</i> <sup>Def</sup> 546-<br>/- APAP   | TRXR1/GAP<br>DH | C1:10 | 2 | GAPDH | 491 | 38 | 339383.5 | 2344830 | 84.9 | 100  | 6.5  | 5840.2  | 1420.1 |
| <i>Alkbh8</i> <sup>Def</sup> 547-<br>/- APAP   | TRXR1/GAP<br>DH | C1:15 | 1 | GAPDH | 470 | 40 | 928417.5 | 7122660 | 100  | 100  | 7.2  | 13026.5 | 1735.4 |
| <i>Alkbh8</i> <sup>Def</sup> 547-<br>/- APAP   | TRXR1/GAP<br>DH | C1:15 | 3 | TRXR1 | 516 | 55 | 87432.9  | 1292238 | 15.4 | 18.1 | 13.9 | 987.7   | 1780   |
| <i>Alkbh8</i> <sup>Def</sup> 548-<br>/- APAP   | TRXR1/GAP<br>DH | C1:6  | 1 | GAPDH | 487 | 39 | 1065369  | 7837010 | 85.5 | 100  | 6.9  | 17383.8 | 1631.5 |
| <i>Alkbh8</i> <sup>Def</sup> 548-<br>/- APAP   | TRXR1/GAP<br>DH | C1:6  | 2 | TRXR1 | 534 | 55 | 118215.5 | 1324038 | 14.5 | 16.9 | 10.5 | 1797.2  | 1762.6 |
| WT521Saline                                    | TRXR2/GAP<br>DH | C1:14 | 1 | GAPDH | 491 | 40 | 594262.4 | 3922895 | 97.7 | 100  | 6.2  | 48712.9 | 233.5  |
| WT521Saline                                    | TRXR2/GAP<br>DH | C1:14 | 2 | TRXR2 | 540 | 57 | 9670.1   | 94366   | 2.3  | 2.4  | 9.2  | 802.1   | 272.2  |
| WT522Saline                                    | TRXR2/GAP<br>DH | C1:15 | 1 | GAPDH | 493 | 40 | 402909.6 | 2553664 | 97.3 | 100  | 6    | 25460   | 236.7  |
| WT522Saline                                    | TRXR2/GAP<br>DH | C1:15 | 2 | TRXR2 | 541 | 57 | 7146.2   | 70365   | 2.7  | 2.8  | 9.3  | 467     | 275.1  |
| WT526Saline                                    | TRXR2/GAP<br>DH | C1:16 | 1 | GAPDH | 491 | 40 | 538677.9 | 3566008 | 98.1 | 100  | 6.2  | 48026.6 | 196.4  |
| WT526Saline                                    | TRXR2/GAP<br>DH | C1:16 | 2 | TRXR2 | 540 | 57 | 7411.7   | 69997   | 1.9  | 2    | 8.9  | 664.1   | 219.6  |
| <i>Alkbh8</i> <sup>Def</sup> 549-<br>/- Saline | TRXR2/GAP<br>DH | C1:17 | 1 | GAPDH | 492 | 39 | 607590.5 | 4029011 | 97.7 | 100  | 6.2  | 52912.8 | 201.4  |
| <i>Alkbh8</i> <sup>Def</sup> 549-<br>/- Saline | TRXR2/GAP<br>DH | C1:17 | 2 | TRXR2 | 540 | 56 | 9377.1   | 93718   | 2.3  | 2.3  | 9.4  | 814.4   | 227.5  |
| <i>Alkbh8</i> <sup>Def</sup> 550-<br>/- Saline | TRXR2/GAP<br>DH | C1:18 | 1 | GAPDH | 491 | 39 | 741488   | 5124450 | 97.5 | 100  | 6.5  | 73514.3 | 162.8  |
| <i>Alkbh8</i> <sup>Def</sup> 550-<br>/- Saline | TRXR2/GAP<br>DH | C1:18 | 2 | TRXR2 | 540 | 56 | 12812.5  | 129741  | 2.5  | 2.5  | 9.5  | 1262.6  | 201.6  |
| <i>Alkbh8</i> <sup>Def</sup> 551-<br>/- Saline | TRXR2/GAP<br>DH | C1:19 | 1 | GAPDH | 491 | 39 | 703891.8 | 5230940 | 97.1 | 100  | 7    | 61262.2 | 177.6  |
| <i>Alkbh8</i> <sup>Def</sup> 551-<br>/- Saline | TRXR2/GAP<br>DH | C1:19 | 2 | TRXR2 | 540 | 56 | 13317.5  | 157850  | 2.9  | 3    | 11.1 | 1054.9  | 192.5  |
| WT525 APAP                                     | TRXR2/GAP<br>DH | C1:18 | 2 | GAPDH | 469 | 39 | 517747.7 | 3643415 | 100  | 100  | 6.6  | 38919.5 | 260.8  |
| WT525 APAP                                     | TRXR2/GAP<br>DH | C1:18 | 4 | TRXR2 | 518 | 56 | 16681    | 238889  | 6.2  | 6.6  | 13.5 | 984.5   | 339.6  |
| WT527 APAP                                     | TRXR2/GAP<br>DH | C1:21 | 2 | GAPDH | 492 | 40 | 575883.6 | 3989174 | 94.7 | 100  | 6.5  | 45127.9 | 154.9  |
| WT527 APAP                                     | TRXR2/GAP<br>DH | C1:21 | 3 | TRXR2 | 539 | 56 | 18934    | 223374  | 5.3  | 5.6  | 11.1 | 1387.8  | 189.8  |
| WT528 APAP                                     | TRXR2/GAP<br>DH | C1:22 | 2 | GAPDH | 495 | 38 | 176883   | 1197732 | 93.2 | 100  | 6.4  | 15283.7 | 95.7   |

|                                            |             |       |   |       |     |    |          |         |      |      |      |         |       |
|--------------------------------------------|-------------|-------|---|-------|-----|----|----------|---------|------|------|------|---------|-------|
| WT528 APAP                                 | TRXR2/GAPDH | C1:22 | 3 | TRXR2 | 543 | 51 | 7242.3   | 87202   | 6.8  | 7.3  | 11.3 | 616.3   | 103.6 |
| <i>Alkbh8</i> <sup>Def</sup> 546-/- APAP   | TRXR2/GAPDH | C1:23 | 1 | GAPDH | 493 | 40 | 685699.6 | 4875224 | 97   | 100  | 6.7  | 60851   | 102.7 |
| <i>Alkbh8</i> <sup>Def</sup> 546-/- APAP   | TRXR2/GAPDH | C1:23 | 2 | TRXR2 | 541 | 56 | 13380.2  | 150990  | 3    | 3.1  | 10.6 | 1105.9  | 105.4 |
| <i>Alkbh8</i> <sup>Def</sup> 547-/- APAP   | TRXR2/GAPDH | C1:24 | 1 | GAPDH | 494 | 39 | 791208.9 | 5630355 | 96.6 | 100  | 6.7  | 68963.9 | 100.1 |
| <i>Alkbh8</i> <sup>Def</sup> 547-/- APAP   | TRXR2/GAPDH | C1:24 | 2 | TRXR2 | 541 | 56 | 17871.9  | 199552  | 3.4  | 3.5  | 10.5 | 1488.4  | 107.5 |
| <i>Alkbh8</i> <sup>Def</sup> 548-/- APAP   | TRXR2/GAPDH | C1:25 | 2 | GAPDH | 495 | 39 | 882530.7 | 6432035 | 95.1 | 100  | 6.8  | 97145.7 | 107.8 |
| <i>Alkbh8</i> <sup>Def</sup> 548-/- APAP   | TRXR2/GAPDH | C1:25 | 3 | TRXR2 | 542 | 55 | 28451.6  | 331057  | 4.9  | 5.1  | 10.9 | 2872.4  | 128.6 |
| WT521 Saline                               | SELS/GAPDH  | C1:2  | 1 | SELS  | 455 | 32 | 37948.4  | 395404  | 13.4 | 15.5 | 9.8  | 4425.3  | 91.2  |
| WT521 Saline                               | SELS/GAPDH  | C1:2  | 2 | GAPDH | 487 | 40 | 383116.7 | 2544680 | 86.6 | 100  | 6.2  | 44452.3 | 111.6 |
| WT522 Saline                               | SELS/GAPDH  | C1:4  | 1 | SELS  | 453 | 32 | 45598.6  | 508807  | 21.2 | 26.9 | 10.5 | 3477.6  | 146.3 |
| WT522 Saline                               | SELS/GAPDH  | C1:4  | 2 | GAPDH | 485 | 40 | 281968.7 | 1888015 | 78.8 | 100  | 6.3  | 21750.2 | 168   |
| WT526 Saline                               | SELS/GAPDH  | C1:23 | 2 | SELS  | 443 | 31 | 51349.6  | 631775  | 20.1 | 25.2 | 11.6 | 6799    | 55.5  |
| WT526 Saline                               | SELS/GAPDH  | C1:23 | 3 | GAPDH | 473 | 37 | 298015.8 | 2509593 | 100  | 100  | 7.9  | 43284.7 | 58.3  |
| <i>Alkbh8</i> <sup>Def</sup> 549-/- Saline | SELS/GAPDH  | C1:5  | 1 | SELS  | 451 | 32 | 39733.1  | 462656  | 18.8 | 23.1 | 10.9 | 3015.6  | 230.8 |
| <i>Alkbh8</i> <sup>Def</sup> 549-/- Saline | SELS/GAPDH  | C1:5  | 2 | GAPDH | 484 | 40 | 302264.8 | 2002088 | 81.2 | 100  | 6.2  | 23297.2 | 282.2 |
| <i>Alkbh8</i> <sup>Def</sup> 550-/- Saline | SELS/GAPDH  | C1:6  | 1 | SELS  | 452 | 32 | 48520.1  | 535058  | 15.7 | 18.6 | 10.4 | 4049.7  | 145.6 |
| <i>Alkbh8</i> <sup>Def</sup> 550-/- Saline | SELS/GAPDH  | C1:6  | 2 | GAPDH | 485 | 40 | 440255.3 | 2870522 | 84.3 | 100  | 6.1  | 36845.8 | 168.7 |
| <i>Alkbh8</i> <sup>Def</sup> 551-/- Saline | SELS/GAPDH  | C1:7  | 1 | SELS  | 454 | 32 | 59260.3  | 643864  | 16.1 | 19.2 | 10.2 | 3995.4  | 186.8 |
| <i>Alkbh8</i> <sup>Def</sup> 551-/- Saline | SELS/GAPDH  | C1:7  | 2 | GAPDH | 485 | 39 | 493997   | 3354100 | 83.9 | 100  | 6.4  | 33606.9 | 197.1 |
| WT525 APAP                                 | SELS/GAPDH  | C1:8  | 1 | SELS  | 454 | 32 | 41668.2  | 442586  | 15.1 | 17.8 | 10   | 3172.5  | 186.7 |
| WT525 APAP                                 | SELS/GAPDH  | C1:8  | 2 | GAPDH | 486 | 40 | 378733.1 | 2480379 | 84.9 | 100  | 6.2  | 28855.3 | 215.8 |
| WT527 APAP                                 | SELS/GAPDH  | C1:9  | 2 | SELS  | 454 | 33 | 46856.7  | 513654  | 18.7 | 22.9 | 10.3 | 3615.9  | 153.5 |
| WT527 APAP                                 | SELS/GAPDH  | C1:9  | 3 | GAPDH | 486 | 40 | 352122.7 | 2239899 | 81.3 | 100  | 6    | 27171.7 | 163.3 |
| WT528 APAP                                 | SELS/GAPDH  | C1:11 | 1 | SELS  | 456 | 32 | 58019.6  | 599189  | 17.6 | 21.3 | 9.7  | 3867.8  | 166.6 |
| WT528 APAP                                 | SELS/GAPDH  | C1:11 | 2 | GAPDH | 487 | 40 | 442481.5 | 2814227 | 82.4 | 100  | 6    | 28843.3 | 170.6 |
| <i>Alkbh8</i> <sup>Def</sup> 546-/- APAP   | SELS/GAPDH  | C1:25 | 2 | SELS  | 446 | 31 | 68843.4  | 862059  | 33.1 | 49.4 | 11.8 | 6892.2  | 36.1  |
| <i>Alkbh8</i> <sup>Def</sup> 546-/- APAP   | SELS/GAPDH  | C1:25 | 3 | GAPDH | 476 | 37 | 215157.8 | 1744480 | 100  | 100  | 7.6  | 24206   | 38    |
| <i>Alkbh8</i> <sup>Def</sup> 547-/- APAP   | SELS/GAPDH  | C1:3  | 1 | SELS  | 455 | 32 | 40197.2  | 455044  | 22.8 | 29.6 | 10.6 | 3017.8  | 104.9 |
| <i>Alkbh8</i> <sup>Def</sup> 547-/- APAP   | SELS/GAPDH  | C1:3  | 2 | GAPDH | 487 | 40 | 222988   | 1539343 | 77.2 | 100  | 6.5  | 17058   | 118.6 |
| <i>Alkbh8</i> <sup>Def</sup> 548-/- APAP   | SELS/GAPDH  | C1:10 | 1 | SELS  | 456 | 32 | 28508.3  | 322789  | 37.3 | 59.4 | 10.6 | 1705.3  | 151.9 |
| <i>Alkbh8</i> <sup>Def</sup> 548-/- APAP   | SELS/GAPDH  | C1:10 | 2 | GAPDH | 489 | 38 | 81626.7  | 543644  | 62.7 | 100  | 6.3  | 4941.9  | 158.7 |

**Supplemental Table S3. WES raw data for all proteins analyzed in 4 day APAP exposure experiment.** Protein quantitation data was normalized to housekeeping protein, GAPDH, and normalized corrected area analysis setting was set to 100 on ProteinSimple Compass Software.

| Sample                                     | Primary Antibody | Capillary | Peak | Name  | Position | MW (kDa) | Height   | Area     | % Area | Corr. Area | Width | S/N     | Baseline |
|--------------------------------------------|------------------|-----------|------|-------|----------|----------|----------|----------|--------|------------|-------|---------|----------|
| WT31Saline                                 | GPX1/GAPDH       | C1:2      | 1    | GPX1  | 418      | 28       | 40129.5  | 343312   | 18.2   | 22.3       | 8     | 1340.9  | 259.9    |
| WT31Saline                                 | GPX1/GAPDH       | C1:2      | 2    | GAPDH | 466      | 39       | 233098.3 | 1541883  | 100    | 100        | 6.2   | 7363.4  | 286.6    |
| WT32Saline                                 | GPX1/GAPDH       | C1:3      | 1    | GPX1  | 415      | 28       | 35244.6  | 298654   | 21.3   | 27         | 8     | 1032.7  | 282.7    |
| WT32Saline                                 | GPX1/GAPDH       | C1:3      | 2    | GAPDH | 463      | 39       | 173813.4 | 1105148  | 100    | 100        | 6     | 4664    | 347.1    |
| WT33Saline                                 | GPX1/GAPDH       | C1:4      | 1    | GPX1  | 413      | 28       | 74896.2  | 536060   | 19.4   | 24.1       | 6.7   | 2075.8  | 378.9    |
| WT33Saline                                 | GPX1/GAPDH       | C1:4      | 2    | GAPDH | 460      | 39       | 350630.2 | 2224005  | 100    | 100        | 6     | 9321.9  | 428.4    |
| <i>Alkbh8</i> <sup>Def38</sup> 5-/- Saline | GPX1/GAPDH       | C1:24     | 1    | GPX1  | 429      | 28       | 86820.3  | 689265   | 5.7    | 6.1        | 7.5   | 2393.5  | 382.5    |
| <i>Alkbh8</i> <sup>Def38</sup> 5-/- Saline | GPX1/GAPDH       | C1:24     | 3    | GAPDH | 481      | 39       | 1358158  | 11369844 | 93.9   | 100        | 7.9   | 41919.1 | 435.9    |
| <i>Alkbh8</i> <sup>Def33</sup> -/- Saline  | GPX1/GAPDH       | C1:13     | 1    | GPX1  | 417      | 28       | 25332.9  | 184464   | 5      | 5.3        | 6.8   | 1410.2  | 334.5    |
| <i>Alkbh8</i> <sup>Def33</sup> -/- Saline  | GPX1/GAPDH       | C1:13     | 2    | GAPDH | 467      | 39       | 547989.3 | 3493769  | 100    | 100        | 6     | 30166.5 | 387.6    |
| <i>Alkbh8</i> <sup>Def31</sup> -/- Saline  | GPX1/GAPDH       | C1:6      | 1    | GPX1  | 413      | 28       | 11044    | 101371   | 3.9    | 4.1        | 8.6   | 475.8   | 395.4    |
| <i>Alkbh8</i> <sup>Def31</sup> -/- Saline  | GPX1/GAPDH       | C1:6      | 2    | GAPDH | 464      | 39       | 371041.7 | 2471133  | 100    | 100        | 6.3   | 14955.4 | 490.1    |
| WT84 APAP                                  | GPX1/GAPDH       | C1:4      | 2    | GPX1  | 417      | 28       | 32896.5  | 262136   |        | 48.6       | 7.5   | 612.6   | 721.5    |
| WT84 APAP                                  | GPX1/GAPDH       | C1:4      | 3    | GAPDH | 465      | 40       | 88959.1  | 539041   | 89.3   | 100        | 5.7   | 1494.6  | 795.9    |
| WT33 APAP                                  | GPX1/GAPDH       | C1:7      | 1    | GPX1  | 417      | 28       | 26481.2  | 212835   | 19     | 23.4       | 7.6   | 923.4   | 521.6    |
| WT33 APAP                                  | GPX1/GAPDH       | C1:7      | 2    | GAPDH | 463      | 39       | 140183.8 | 909708   | 100    | 100        | 6.1   | 4588.3  | 739.1    |
| WT550 APAP                                 | GPX1/GAPDH       | C1:17     | 4    | GPX1  | 418      | 28       | 32929.6  | 480163   | 24.4   | 32.4       | 13.7  | 461.5   | 1399.6   |
| WT550 APAP                                 | GPX1/GAPDH       | C1:17     | 2    | GAPDH | 472      | 39       | 199006.1 | 1484222  | 100    | 100        | 7     | 3215.4  | 1279.5   |
| <i>Alkbh8</i> <sup>Def30</sup> -/- APAP    | GPX1/GAPDH       | C1:11     | 1    | GPX1  | 418      | 28       | 20830    | 163081   | 9.9    | 11         | 7.4   | 566.2   | 459.9    |
| <i>Alkbh8</i> <sup>Def30</sup> -/- APAP    | GPX1/GAPDH       | C1:11     | 2    | GAPDH | 465      | 39       | 247986.2 | 1482107  | 100    | 100        | 5.6   | 6230.3  | 506      |
| <i>Alkbh8</i> <sup>Def31</sup> -/- APAP    | GPX1/GAPDH       | C1:12     | 1    | GPX1  | 416      | 28       | 24618.2  | 183857   | 8.6    | 9.4        | 7     | 645.9   | 467.4    |
| <i>Alkbh8</i> <sup>Def31</sup> -/- APAP    | GPX1/GAPDH       | C1:12     | 2    | GAPDH | 463      | 39       | 339718.5 | 1947598  | 100    | 100        | 5.4   | 8081.1  | 518.4    |
| <i>Alkbh8</i> <sup>Def33</sup> -/- APAP    | GPX1/GAPDH       | C1:13     | 1    | GPX1  | 418      | 28       | 44700.6  | 335308   | 11.4   | 12.8       | 7     | 942.9   | 567.2    |
| <i>Alkbh8</i> <sup>Def33</sup> -/- APAP    | GPX1/GAPDH       | C1:13     | 2    | GAPDH | 464      | 39       | 419842.9 | 2610890  | 100    | 100        | 5.8   | 8473.6  | 601.6    |
| WT31Saline                                 | GPX3/GAPDH       | C1:14     | 1    | GPX3  | 417      | 28       | 2225.4   | 19920    | 1.2    | 1.2        | 8.4   | 44.3    | 461.5    |
| WT31Saline                                 | GPX3/GAPDH       | C1:14     | 2    | GAPDH | 465      | 39       | 267941.1 | 1670047  | 100    | 100        | 5.9   | 6192    | 529.1    |



|                                                |            |       |   |       |     |    |          |          |      |      |      |         |       |
|------------------------------------------------|------------|-------|---|-------|-----|----|----------|----------|------|------|------|---------|-------|
| WT32Saline                                     | GPX3/GAPDH | C1:15 | 1 | GPX3  | 418 | 28 | 1871.1   | 16611    | 1.1  | 1.1  | 8.3  | 43.7    | 557.2 |
| WT32Saline                                     | GPX3/GAPDH | C1:15 | 2 | GAPDH | 464 | 39 | 245808.4 | 1541493  | 100  | 100  | 5.9  | 6146.2  | 650.1 |
| WT33Saline                                     | GPX3/GAPDH | C1:16 | 1 | GPX3  | 417 | 28 | 6493.9   | 51461    | 2    | 2    | 7.4  | 190.6   | 408   |
| WT33Saline                                     | GPX3/GAPDH | C1:16 | 2 | GAPDH | 462 | 39 | 410524.9 | 2582026  | 100  | 100  | 5.9  | 12116.8 | 415.4 |
| <i>Alkbh8</i> <sup>Def</sup> 38<br>5-/- Saline | GPX3/GAPDH | C1:17 | 1 | GPX3  | 419 | 28 | 2850.7   | 22703    | 1.3  | 1.3  | 7.5  | 60.3    | 449.1 |
| <i>Alkbh8</i> <sup>Def</sup> 38<br>5-/- Saline | GPX3/GAPDH | C1:17 | 2 | GAPDH | 465 | 39 | 287822   | 1759182  | 100  | 100  | 5.7  | 6858.2  | 482.6 |
| <i>Alkbh8</i> <sup>Def</sup> 33-<br>/- Saline  | GPX3/GAPDH | C1:18 | 1 | GPX3  | 420 | 28 | 4080.6   | 30441    | 1.3  | 1.3  | 7    | 126.8   | 503   |
| <i>Alkbh8</i> <sup>Def</sup> 33-<br>/- Saline  | GPX3/GAPDH | C1:18 | 2 | GAPDH | 466 | 39 | 364356.7 | 2306516  | 100  | 100  | 5.9  | 11428.3 | 576.2 |
| <i>Alkbh8</i> <sup>Def</sup> 31-<br>/- Saline  | GPX3/GAPDH | C1:19 | 1 | GPX3  | 418 | 28 | 1612.5   | 12533    | 0.7  | 0.7  | 7.3  | 43.9    | 644.8 |
| <i>Alkbh8</i> <sup>Def</sup> 31-<br>/- Saline  | GPX3/GAPDH | C1:19 | 2 | GAPDH | 465 | 39 | 271618   | 1789541  | 100  | 100  | 6.2  | 7696.1  | 915.3 |
| WT84 APAP                                      | GPX3/GAPDH | C1:2  | 1 | GPX4  | 415 | 27 | 11639.5  | 102347   | 3.9  | 4    | 8.3  | 437.4   | 287.2 |
| WT84 APAP                                      | GPX3/GAPDH | C1:2  | 2 | GAPDH | 467 | 39 | 397058.3 | 2539391  | 100  | 100  | 6    | 13927   | 368.7 |
| WT33 APAP                                      | GPX3/GAPDH | C1:23 | 1 | GPX3  | 452 | 28 | 5868.4   | 57576    | 2    | 2    | 9.2  | 138     | 475.7 |
| WT33 APAP                                      | GPX3/GAPDH | C1:23 | 2 | GAPDH | 494 | 38 | 337697.6 | 2856441  | 98   | 100  | 7.9  | 8020.9  | 557.2 |
| WT550<br>APAP                                  | GPX3/GAPDH | C1:22 | 1 | GPX3  | 455 | 28 | 1819     | 20147    | 4.5  | 4.7  | 10.4 | 50.5    | 489.3 |
| WT550<br>APAP                                  | GPX3/GAPDH | C1:22 | 2 | GAPDH | 500 | 37 | 55633.7  | 431484   | 95.5 | 100  | 7.3  | 1716.3  | 627.1 |
| <i>Alkbh8</i> <sup>Def</sup> 30-<br>/- APAP    | GPX3/GAPDH | C1:20 | 1 | GPX3  | 418 | 28 | 1131.4   | 10178    | 0.5  | 0.5  | 8.5  | 17.9    | 539.5 |
| <i>Alkbh8</i> <sup>Def</sup> 30-<br>/- APAP    | GPX3/GAPDH | C1:20 | 2 | GAPDH | 465 | 39 | 324220.5 | 2075199  | 100  | 100  | 6    | 7306.2  | 639.7 |
| <i>Alkbh8</i> <sup>Def</sup> 31-<br>/- APAP    | GPX3/GAPDH | C1:23 | 1 | GPX3  | 418 | 28 | 1024     | 9055     | 0.4  | 0.4  | 8.3  | 19.6    | 537.9 |
| <i>Alkbh8</i> <sup>Def</sup> 31-<br>/- APAP    | GPX3/GAPDH | C1:23 | 2 | GAPDH | 466 | 39 | 310289.9 | 2017076  | 100  | 100  | 6.1  | 7838.1  | 621.1 |
| <i>Alkbh8</i> <sup>Def</sup> 33-<br>/- APAP    | GPX3/GAPDH | C1:24 | 1 | GPX3  | 421 | 28 | 2820.5   | 22825    | 1.2  | 1.2  | 7.6  | 79.2    | 380.5 |
| <i>Alkbh8</i> <sup>Def</sup> 33-<br>/- APAP    | GPX3/GAPDH | C1:24 | 2 | GAPDH | 466 | 39 | 293863.9 | 1863307  | 100  | 100  | 6    | 8991.1  | 397.6 |
| WT31Saline                                     | GPX4/GAPDH | C1:6  | 1 | GPX4  | 429 | 27 | 35695.8  | 300060   | 5    | 5.2  | 7.9  | 1537.5  | 388.6 |
| WT31Saline                                     | GPX4/GAPDH | C1:6  | 2 | GAPDH | 486 | 39 | 853578.7 | 5741046  | 95   | 100  | 6.3  | 36274.7 | 464.3 |
| WT32Saline                                     | GPX4/GAPDH | C1:22 | 1 | GPX4  | 426 | 27 | 213285.6 | 1648104  | 10   | 11.2 | 7.3  | 6894.5  | 429.2 |
| WT32Saline                                     | GPX4/GAPDH | C1:22 | 3 | GAPDH | 475 | 39 | 1414955  | 14734174 | 89.2 | 100  | 9.8  | 50726.5 | 504.7 |
| WT33Saline                                     | GPX4/GAPDH | C1:23 | 1 | GPX4  | 427 | 27 | 144364.1 | 1132737  | 8.1  | 8.9  | 7.4  | 3911    | 388.8 |
| WT33Saline                                     | GPX4/GAPDH | C1:23 | 3 | GAPDH | 479 | 40 | 1403219  | 12712120 | 91   | 100  | 8.5  | 42555.5 | 456.2 |
| <i>Alkbh8</i> <sup>Def</sup> 38<br>5-/- Saline | GPX4/GAPDH | C1:2  | 1 | GPX4  | 415 | 27 | 11639.5  | 102347   | 3.9  | 4    | 8.3  | 437.4   | 287.2 |

|                                            |             |       |   |       |     |    |          |          |      |      |      |         |        |
|--------------------------------------------|-------------|-------|---|-------|-----|----|----------|----------|------|------|------|---------|--------|
| <i>Alkbh8</i> <sup>Def</sup> 385-/- Saline | GPX4/GAPDH  | C1:2  | 2 | GAPDH | 467 | 39 | 397058.3 | 2539391  | 100  | 100  | 6    | 13927   | 368.7  |
| <i>Alkbh8</i> <sup>Def</sup> 33-/- Saline  | GPX4/GAPDH  | C1:3  | 1 | GPX4  | 415 | 27 | 9348.2   | 86532    | 4.5  | 4.7  | 8.7  | 433.6   | 420.8  |
| <i>Alkbh8</i> <sup>Def</sup> 33-/- Saline  | GPX4/GAPDH  | C1:3  | 2 | GAPDH | 467 | 39 | 266535.3 | 1835188  | 100  | 100  | 6.5  | 12001.4 | 624.8  |
| <i>Alkbh8</i> <sup>Def</sup> 31-/- Saline  | GPX4/GAPDH  | C1:6  | 1 | GPX4  | 413 | 27 | 11044    | 101371   | 3.9  | 4.1  | 8.6  | 475.8   | 395.4  |
| <i>Alkbh8</i> <sup>Def</sup> 31-/- Saline  | GPX4/GAPDH  | C1:6  | 2 | GAPDH | 464 | 39 | 371041.7 | 2471133  | 100  | 100  | 6.3  | 14955.4 | 490.1  |
| WT84 APAP                                  | GPX4/GAPDH  | C1:5  | 1 | GPX4  | 421 | 27 | 202436.9 | 1583407  | 9.1  | 10.1 | 7.3  | 5175.4  | 441.1  |
| WT84 APAP                                  | GPX4/GAPDH  | C1:5  | 2 | GAPDH | 470 | 39 | 1532362  | 15748273 | 90.9 | 100  | 9.7  | 43306.9 | 501.1  |
| WT33 APAP                                  | GPX4/GAPDH  | C1:6  | 1 | GPX4  | 422 | 27 | 215369.8 | 1621761  | 9.3  | 10.2 | 7.1  | 3960.5  | 574.6  |
| WT33 APAP                                  | GPX4/GAPDH  | C1:6  | 2 | GAPDH | 470 | 39 | 1516815  | 15896473 | 90.7 | 100  | 9.8  | 30523.8 | 675.2  |
| WT550 APAP                                 | GPX4/GAPDH  | C1:24 | 1 | GPX4  | 429 | 27 | 86820.3  | 689265   | 5.7  | 6.1  | 7.5  | 2393.5  | 382.5  |
| WT550 APAP                                 | GPX4/GAPDH  | C1:24 | 3 | GAPDH | 481 | 41 | 1358158  | 11369844 | 93.9 | 100  | 7.9  | 41919.1 | 435.9  |
| <i>Alkbh8</i> <sup>Def</sup> 30-/- APAP    | GPX4/GAPDH  | C1:8  | 1 | GPX4  | 416 | 27 | 11443    | 108125   | 4.1  | 4.3  | 8.9  | 542.1   | 321.1  |
| <i>Alkbh8</i> <sup>Def</sup> 30-/- APAP    | GPX4/GAPDH  | C1:8  | 2 | GAPDH | 468 | 40 | 388739.6 | 2538523  | 100  | 100  | 6.1  | 17065.4 | 399.6  |
| <i>Alkbh8</i> <sup>Def</sup> 31-/- APAP    | GPX4/GAPDH  | C1:9  | 1 | GPX4  | 415 | 27 | 20099.5  | 156261   | 4.2  | 4.4  | 7.3  | 989.6   | 362.6  |
| <i>Alkbh8</i> <sup>Def</sup> 31-/- APAP    | GPX4/GAPDH  | C1:9  | 2 | GAPDH | 465 | 39 | 531114.3 | 3532639  | 100  | 100  | 6.2  | 26046.1 | 415.5  |
| <i>Alkbh8</i> <sup>Def</sup> 33-/- APAP    | GPX4/GAPDH  | C1:11 | 1 | GPX4  | 416 | 27 | 10104.2  | 86419    | 4.7  | 4.9  | 8    | 428.1   | 496.9  |
| <i>Alkbh8</i> <sup>Def</sup> 33-/- APAP    | GPX4/GAPDH  | C1:11 | 2 | GAPDH | 468 | 39 | 282969.1 | 1746631  | 100  | 100  | 5.8  | 10899.3 | 665.7  |
| WT31Saline                                 | TRXR1/GAPDH | C1:14 | 3 | TRXR1 | 514 | 56 | 70222.4  | 759048   | 29.3 | 41.4 | 10.2 | 991.3   | 1416.8 |
| WT31Saline                                 | TRXR1/GAPDH | C1:14 | 1 | GAPDH | 469 | 39 | 288439.9 | 1834181  | 100  | 100  | 6    | 4035.9  | 1370.5 |
| WT32Saline                                 | TRXR1/GAPDH | C1:15 | 4 | TRXR1 | 512 | 55 | 57290.6  | 628364   | 31.5 | 46.1 | 10.3 | 800.1   | 1275.9 |
| WT32Saline                                 | TRXR1/GAPDH | C1:15 | 1 | GAPDH | 468 | 39 | 210057.9 | 1364096  | 100  | 100  | 6.1  | 3018.2  | 1245   |
| WT33Saline                                 | TRXR1/GAPDH | C1:16 | 3 | TRXR1 | 513 | 55 | 91597.6  | 1160188  | 25.4 | 34.1 | 11.9 | 1126.5  | 1348.1 |
| WT33Saline                                 | TRXR1/GAPDH | C1:16 | 1 | GAPDH | 468 | 39 | 529470.9 | 3402601  | 100  | 100  | 6    | 6936.3  | 1285.6 |
| <i>Alkbh8</i> <sup>Def</sup> 385-/- Saline | TRXR1/GAPDH | C1:7  | 1 | GAPDH | 449 | 39 | 1192115  | 10935916 | 85   | 100  | 8.6  | 27842.1 | 1347.8 |
| <i>Alkbh8</i> <sup>Def</sup> 385-/- Saline | TRXR1/GAPDH | C1:7  | 2 | TrxR1 | 496 | 55 | 115887.5 | 1930032  | 15   | 17.6 | 15.6 | 1842.9  | 1504.2 |
| <i>Alkbh8</i> <sup>Def</sup> 33-/- Saline  | TRXR1/GAPDH | C1:8  | 2 | GAPDH | 452 | 40 | 1143360  | 9046184  | 86.1 | 100  | 7.4  | 19409.5 | 1468.8 |

|                                            |             |       |   |       |     |    |          |          |      |      |      |         |        |
|--------------------------------------------|-------------|-------|---|-------|-----|----|----------|----------|------|------|------|---------|--------|
| <i>Alkbh8<sup>Def</sup></i> 33-/- Saline   | TRXR1/GAPDH | C1:8  | 3 | TrxR1 | 497 | 55 | 104298.7 | 1465583  | 13.9 | 16.2 | 13.2 | 1410.2  | 1658   |
| <i>Alkbh8<sup>Def</sup></i> 31-/- Saline   | TRXR1/GAPDH | C1:10 | 2 | GAPDH | 452 | 40 | 1191875  | 9877595  | 86.7 | 100  | 7.8  | 21024.1 | 1153.4 |
| <i>Alkbh8<sup>Def</sup></i> 31-/- Saline   | TRXR1/GAPDH | C1:10 | 3 | TrxR1 | 499 | 55 | 114268.8 | 1521465  | 13.3 | 15.4 | 12.5 | 1654.9  | 1226.7 |
| WT84 APAP                                  | TRXR1/GAPDH | C1:23 | 1 | GAPDH | 468 | 39 | 337495.2 | 2140557  | 100  | 100  | 6    | 7736.6  | 1102.1 |
| WT84 APAP                                  | TRXR1/GAPDH | C1:23 | 3 | TRXR1 | 512 | 55 | 157877.7 | 1693620  | 44.2 | 79.1 | 10.1 | 3738.4  | 1138.2 |
| WT33 APAP                                  | TRXR1/GAPDH | C1:24 | 1 | GAPDH | 469 | 39 | 532928.8 | 3489732  | 100  | 100  | 6.2  | 9395.7  | 1315.3 |
| WT33 APAP                                  | TRXR1/GAPDH | C1:24 | 3 | TRXR1 | 513 | 55 | 222038.5 | 2540597  | 42.1 | 72.8 | 10.7 | 3868.5  | 1440.9 |
| WT550 APAP                                 | TRXR1/GAPDH | C1:25 | 1 | GAPDH | 470 | 39 | 657591.1 | 4431630  | 100  | 100  | 6.3  | 13510.2 | 1108   |
| WT550 APAP                                 | TRXR1/GAPDH | C1:25 | 3 | TRXR1 | 513 | 55 | 228184.6 | 2886554  | 39.4 | 65.1 | 11.9 | 4270.2  | 1093.2 |
| <i>Alkbh8<sup>Def</sup></i> 30-/- APAP     | TRXR1/GAPDH | C1:20 | 1 | GAPDH | 469 | 39 | 446080.5 | 2893694  | 100  | 100  | 6.1  | 7801.8  | 1127.3 |
| <i>Alkbh8<sup>Def</sup></i> 30-/- APAP     | TRXR1/GAPDH | C1:20 | 3 | TRXR1 | 513 | 55 | 123676.9 | 1312675  | 31.2 | 45.4 | 10   | 2212.4  | 1182.3 |
| <i>Alkbh8<sup>Def</sup></i> 31-/- APAP     | TRXR1/GAPDH | C1:11 | 3 | GAPDH | 471 | 39 | 1399523  | 14786023 | 72.7 | 100  | 9.9  | 30745.4 | 1509.4 |
| <i>Alkbh8<sup>Def</sup></i> 31-/- APAP     | TRXR1/GAPDH | C1:11 | 4 | TrxR1 | 517 | 55 | 384227.8 | 5559228  | 27.3 | 37.6 | 13.6 | 6450.2  | 1620.5 |
| <i>Alkbh8<sup>Def</sup></i> 33-/- APAP     | TRXR1/GAPDH | C1:12 | 2 | GAPDH | 472 | 39 | 1365379  | 14166739 | 77.5 | 100  | 9.7  | 28320.6 | 1507.5 |
| <i>Alkbh8<sup>Def</sup></i> 33-/- APAP     | TRXR1/GAPDH | C1:12 | 3 | TrxR1 | 518 | 54 | 261367.2 | 4098671  | 22.4 | 28.9 | 14.7 | 3891.8  | 1599.7 |
| WT31Saline                                 | TRXR2/GAPDH | C1:2  | 3 | GAPDH | 464 | 39 | 459326.5 | 3055865  | 100  | 100  | 6.3  | 53915.9 | 95.3   |
| WT31Saline                                 | TRXR2/GAPDH | C1:2  | 5 | TRXR2 | 511 | 56 | 14701.9  | 159784   | 5    | 5.2  | 10.2 | 1650.1  | 107.1  |
| WT32Saline                                 | TRXR2/GAPDH | C1:3  | 2 | GAPDH | 466 | 41 | 138965.2 | 803676   |      | 100  | 5.4  | 22106.5 | 81     |
| WT32Saline                                 | TRXR2/GAPDH | C1:3  | 3 | TRXR2 | 513 | 57 | 4983.4   | 39637    | 100  | 4.9  | 7.5  | 825     | 91.5   |
| WT33Saline                                 | TRXR2/GAPDH | C1:4  | 2 | GAPDH | 466 | 40 | 511223.5 | 3391163  | 100  | 100  | 6.2  | 75772.4 | 104.5  |
| WT33Saline                                 | TRXR2/GAPDH | C1:4  | 4 | TRXR2 | 513 | 56 | 13117.2  | 110304   | 3.2  | 3.3  | 7.9  | 1680.6  | 111.5  |
| <i>Alkbh8<sup>Def</sup></i> 38 5-/- Saline | TRXR2/GAPDH | C1:5  | 1 | GAPDH | 467 | 40 | 184022.2 | 1131687  | 100  | 100  | 5.8  | 16344.3 | 129.4  |
| <i>Alkbh8<sup>Def</sup></i> 38 5-/- Saline | TRXR2/GAPDH | C1:5  | 3 | TRXR2 | 513 | 57 | 4608.7   | 45131    | 3.8  | 4    | 9.2  | 430.7   | 139.1  |
| <i>Alkbh8<sup>Def</sup></i> 33-/- Saline   | TRXR2/GAPDH | C1:6  | 1 | GAPDH | 468 | 40 | 199282.1 | 1205769  | 100  | 100  | 5.7  | 21475   | 141.5  |

|                                            |             |       |   |       |     |    |          |         |      |      |      |          |       |
|--------------------------------------------|-------------|-------|---|-------|-----|----|----------|---------|------|------|------|----------|-------|
| <i>Alkbh8</i> <sup>Def</sup> 33-/- Saline  | TRXR2/GAPDH | C1:6  | 3 | TRXR2 | 514 | 57 | 5630.6   | 43180   | 3.5  | 3.6  | 7.2  | 606.9    | 150.9 |
| <i>Alkbh8</i> <sup>Def</sup> 31-/- Saline  | TRXR2/GAPDH | C1:7  | 1 | GAPDH | 468 | 40 | 113837.9 | 659408  | 100  | 100  | 5.4  | 13882.6  | 125   |
| <i>Alkbh8</i> <sup>Def</sup> 31-/- Saline  | TRXR2/GAPDH | C1:7  | 3 | TRXR2 | 515 | 57 | 4228.7   | 33727   | 4.9  | 5.1  | 7.5  | 546.2    | 136.9 |
| WT84 APAP                                  | TRXR2/GAPDH | C1:10 | 2 | GAPDH | 455 | 40 | 560704.7 | 3692772 | 93.8 | 100  | 6.2  | 126044   | 107.1 |
| WT84 APAP                                  | TRXR2/GAPDH | C1:10 | 4 | TRXR2 | 505 | 56 | 22075.1  | 243972  | 6.2  | 6.6  | 10.4 | 4803.3   | 109.6 |
| WT33 APAP                                  | TRXR2/GAPDH | C1:7  | 2 | GAPDH | 445 | 38 | 1148180  | 9860372 | 100  | 99.4 | 8.1  | 185483.9 | 72.1  |
| WT33 APAP                                  | TRXR2/GAPDH | C1:7  | 4 | TRXR2 | 496 | 55 | 40732    | 571183  | 5.5  | 5.8  | 13.2 | 4990.5   | 79.2  |
| WT550 APAP                                 | TRXR2/GAPDH | C1:9  | 2 | GAPDH | 446 | 38 | 1034947  | 8687592 | 100  | 99.5 | 7.9  | 200147.3 | 46.2  |
| WT550 APAP                                 | TRXR2/GAPDH | C1:9  | 4 | TRXR2 | 496 | 55 | 42693.7  | 573814  | 6.2  | 6.6  | 12.6 | 6771.6   | 47.3  |
| <i>Alkbh8</i> <sup>Def</sup> 30-/- APAP    | TRXR2/GAPDH | C1:2  | 3 | GAPDH | 464 | 39 | 459326.5 | 3055865 | 100  | 100  | 6.3  | 53915.9  | 95.3  |
| <i>Alkbh8</i> <sup>Def</sup> 30-/- APAP    | TRXR2/GAPDH | C1:2  | 5 | TRXR2 | 511 | 56 | 14701.9  | 159784  | 5    | 5.2  | 10.2 | 1650.1   | 107.1 |
| <i>Alkbh8</i> <sup>Def</sup> 31-/- APAP    | TRXR2/GAPDH | C1:4  | 2 | GAPDH | 466 | 40 | 511223.5 | 3391163 | 100  | 100  | 6.2  | 75772.4  | 104.5 |
| <i>Alkbh8</i> <sup>Def</sup> 31-/- APAP    | TRXR2/GAPDH | C1:4  | 4 | TRXR2 | 513 | 56 | 13117.2  | 110304  | 3.2  | 3.3  | 7.9  | 1680.6   | 111.5 |
| <i>Alkbh8</i> <sup>Def</sup> 33-/- APAP    | TRXR2/GAPDH | C1:7  | 1 | GAPDH | 468 | 40 | 113837.9 | 659408  | 100  | 100  | 5.4  | 13882.6  | 125   |
| <i>Alkbh8</i> <sup>Def</sup> 33-/- APAP    | TRXR2/GAPDH | C1:7  | 3 | TRXR2 | 515 | 57 | 4228.7   | 33727   | 4.9  | 5.1  | 7.5  | 546.2    | 136.9 |
| WT31Saline                                 | SELS/GAPDH  | C1:4  | 2 | SELS  | 421 | 32 | 79261.9  | 922410  | 14.1 | 16.4 | 10.9 | 8359.1   | 103   |
| WT31Saline                                 | SELS/GAPDH  | C1:4  | 3 | GAPDH | 453 | 39 | 779181.8 | 5624588 | 99.2 | 100  | 6.8  | 88777.5  | 109.8 |
| WT32Saline                                 | SELS/GAPDH  | C1:16 | 1 | SELS  | 436 | 32 | 29157.4  | 288728  | 12.5 | 14.2 | 9.3  | 2931.7   | 156.3 |
| WT32Saline                                 | SELS/GAPDH  | C1:16 | 2 | GAPDH | 469 | 40 | 342267.1 | 2027123 | 100  | 100  | 5.6  | 32854.4  | 160.3 |
| WT33Saline                                 | SELS/GAPDH  | C1:23 | 1 | SELS  | 436 | 32 | 30310.8  | 290941  | 15.5 | 18.3 | 9    | 2488.5   | 109.3 |
| WT33Saline                                 | SELS/GAPDH  | C1:23 | 2 | GAPDH | 469 | 40 | 264143.3 | 1587239 | 100  | 100  | 5.6  | 20216.5  | 110.3 |
| <i>Alkbh8</i> <sup>Def</sup> 385-/- Saline | SELS/GAPDH  | C1:17 | 1 | SELS  | 434 | 32 | 30123.1  | 301807  | 18   | 21.9 | 9.4  | 3740.7   | 135.9 |
| <i>Alkbh8</i> <sup>Def</sup> 385-/- Saline | SELS/GAPDH  | C1:17 | 2 | GAPDH | 467 | 40 | 231362   | 1378443 | 100  | 100  | 5.6  | 27341.6  | 137.6 |
| <i>Alkbh8</i> <sup>Def</sup> 33-/- Saline  | SELS/GAPDH  | C1:18 | 1 | SELS  | 435 | 32 | 27300.9  | 257911  | 17.8 | 21.7 | 8.9  | 2525.7   | 130.9 |
| <i>Alkbh8</i> <sup>Def</sup> 33-/- Saline  | SELS/GAPDH  | C1:18 | 2 | GAPDH | 469 | 40 | 210540.7 | 1187568 | 100  | 100  | 5.3  | 17658.2  | 133.3 |
| <i>Alkbh8</i> <sup>Def</sup> 31-/- Saline  | SELS/GAPDH  | C1:19 | 1 | SELS  | 436 | 32 | 15532.7  | 157809  | 100  | 20.1 | 9.5  | 1124.4   | 242.3 |

|                                          |            |       |   |       |     |    |          |         |      |      |      |         |       |
|------------------------------------------|------------|-------|---|-------|-----|----|----------|---------|------|------|------|---------|-------|
| <i>Alkbh8<sup>Def</sup></i> 31-/- Saline | SELS/GAPDH | C1:19 | 3 | GAPDH | 470 | 41 | 133765.8 | 786573  | 100  | 100  | 5.5  | 8907.7  | 271.1 |
| WT84 APAP                                | SELS/GAPDH | C1:20 | 1 | SELS  | 437 | 32 | 30193.8  | 277491  | 100  | 17.1 | 8.6  | 4104.3  | 83.4  |
| WT84 APAP                                | SELS/GAPDH | C1:20 | 3 | GAPDH | 470 | 40 | 275985.2 | 1622128 | 100  | 100  | 5.5  | 34281.3 | 84.2  |
| WT33 APAP                                | SELS/GAPDH | C1:21 | 2 | SELS  | 438 | 32 | 45701.1  | 431390  | 17.1 | 20.7 | 8.9  | 4895.7  | 95.5  |
| WT33 APAP                                | SELS/GAPDH | C1:21 | 3 | GAPDH | 470 | 40 | 340743.1 | 2085712 | 100  | 100  | 5.8  | 33949.3 | 94.9  |
| WT550 APAP                               | SELS/GAPDH | C1:25 | 1 | SELS  | 437 | 32 | 62549.1  | 592575  | 19.4 | 24.1 | 8.9  | 5819    | 92.4  |
| WT550 APAP                               | SELS/GAPDH | C1:25 | 2 | GAPDH | 469 | 40 | 401714.2 | 2456859 | 100  | 100  | 5.7  | 35401.9 | 99.8  |
| <i>Alkbh8<sup>Def</sup></i> 30-/- APAP   | SELS/GAPDH | C1:24 | 1 | SELS  | 435 | 32 | 62576.1  | 600118  | 30.4 | 43.8 | 9    | 7092.5  | 100   |
| <i>Alkbh8<sup>Def</sup></i> 30-/- APAP   | SELS/GAPDH | C1:24 | 2 | GAPDH | 468 | 40 | 231594   | 1371013 | 100  | 100  | 5.6  | 24224.9 | 107.4 |
| <i>Alkbh8<sup>Def</sup></i> 31-/- APAP   | SELS/GAPDH | C1:9  | 2 | SELS  | 459 | 32 | 3390.9   | 31201   | 41.1 | 44.1 | 8.6  | 1073.4  | 66.6  |
| <i>Alkbh8<sup>Def</sup></i> 31-/- APAP   | SELS/GAPDH | C1:9  | 4 | GAPDH | 493 | 41 | 9556.5   | 70728   | 100  | 100  | 7    | 3074.8  | 67.5  |
| <i>Alkbh8<sup>Def</sup></i> 33-/- APAP   | SELS/GAPDH | C1:11 | 3 | SELS  | 455 | 32 | 11024.4  | 121213  | 32.5 | 32.9 | 10.3 | 2213.3  | 67    |
| <i>Alkbh8<sup>Def</sup></i> 33-/- APAP   | SELS/GAPDH | C1:11 | 5 | GAPDH | 488 | 40 | 54613.2  | 368957  | 100  | 100  | 6.3  | 11025.6 | 65.1  |

**Supplemental Table S41. All measured epitranscriptomic marks after daily 600 mg/kg APAP for 4 days.** Calculations for each epitranscriptomic gene count and comparisons between WT and *Alkbh8*<sup>Def</sup> liver tissue post 4 day exposure to 600 mg/kg of APAP with reported statistical significance of biological replicates (N = 3) measured by an unpaired t-test. Increased expression (> 0) is reported in red shade and gene counts expressed (< 0) were reported shaded green. Significant comparisons (p ≤ 0.05) are shaded in yellow.

|                       | WT Saline Average | <i>Alkbh8</i> <sup>Def</sup> Saline Average | WT APAP Average | <i>Alkbh8</i> <sup>Def</sup> APAP Average | WT APAP vs. WT Saline p-Value | <i>Alkbh8</i> <sup>Def</sup> Saline vs WT Saline p-Value | <i>Alkbh8</i> <sup>Def</sup> APAP vs. WT APAP p-Value | <i>Alkbh8</i> <sup>Def</sup> APAP vs. <i>Alkbh8</i> <sup>Def</sup> Saline p-Value | WT APAP vs. WT Saline, change in expression | <i>Alkbh8</i> <sup>Def</sup> APAP vs. <i>Alkbh8</i> <sup>Def</sup> Saline, change in expression | <i>Alkbh8</i> <sup>Def</sup> Saline vs WT Saline, change in expression | <i>Alkbh8</i> <sup>Def</sup> APAP vs. WT APAP, change in expression |
|-----------------------|-------------------|---------------------------------------------|-----------------|-------------------------------------------|-------------------------------|----------------------------------------------------------|-------------------------------------------------------|-----------------------------------------------------------------------------------|---------------------------------------------|-------------------------------------------------------------------------------------------------|------------------------------------------------------------------------|---------------------------------------------------------------------|
| <i>Alkbh1</i>         | 73.98             | 78.98                                       | 67.82           | 98.30                                     | 0.38617                       | 0.41215                                                  | 0.05893                                               | 0.15855                                                                           | -6.16                                       | 19.32                                                                                           | 5.01                                                                   | 30.48                                                               |
| <i>Alkbh2</i>         | 52.00             | 28.86                                       | 30.29           | 22.65                                     | 0.0152                        | 0.00014                                                  | 0.17617                                               | 0.07932                                                                           | -21.71                                      | -6.22                                                                                           | -23.14                                                                 | -7.64                                                               |
| <i>Alkbh3</i>         | 147.78            | 159.45                                      | 148.05          | 135.45                                    | 0.49624                       | 0.3115                                                   | 0.30684                                               | 0.12311                                                                           | 0.27                                        | -24.01                                                                                          | 11.67                                                                  | -12.60                                                              |
| <i>Alkbh4</i>         | 49.71             | 39.23                                       | 55.95           | 35.70                                     | 0.28697                       | 0.06076                                                  | 0.05927                                               | 0.27426                                                                           | 6.23                                        | -3.52                                                                                           | -10.49                                                                 | -20.24                                                              |
| <i>Alkbh5</i>         | 1130.44           | 1038.18                                     | 808.50          | 758.99                                    | 0.03791                       | 0.23968                                                  | 0.27428                                               | 0.00095                                                                           | -321.94                                     | -279.18                                                                                         | -92.27                                                                 | -49.51                                                              |
| <i>Alkbh6</i>         | 99.37             | 76.45                                       | 101.22          | 81.48                                     | 0.46917                       | 0.10266                                                  | 0.19455                                               | 0.34762                                                                           | 1.85                                        | 5.03                                                                                            | -22.92                                                                 | -19.74                                                              |
| <i>Alkbh7</i>         | 174.01            | 151.43                                      | 160.68          | 100.26                                    | 0.4053                        | 0.32116                                                  | 0.10981                                               | 0.09399                                                                           | -13.33                                      | -51.17                                                                                          | -22.58                                                                 | -60.42                                                              |
| <i>Alkbh8</i>         | 82.01             | 38.30                                       | 85.23           | 31.02                                     | 0.37806                       | 0.00165                                                  | 0.00264                                               | 0.18383                                                                           | 3.22                                        | -7.28                                                                                           | -43.72                                                                 | -54.21                                                              |
| <i>Alyref(Reader)</i> | 141.61            | 122.32                                      | 107.54          | 170.92                                    | 0.03746                       | 0.09447                                                  | 0.1152                                                | 0.16681                                                                           | -34.08                                      | 48.60                                                                                           | -19.29                                                                 | 63.39                                                               |
| <i>Cdk5rap1</i>       | 129.16            | 183.84                                      | 92.11           | 96.32                                     | 0.04749                       | 0.06048                                                  | 0.40509                                               | 0.01664                                                                           | -37.05                                      | -87.53                                                                                          | 54.68                                                                  | 4.20                                                                |
| <i>Cdkal1</i>         | 85.95             | 83.04                                       | 57.15           | 75.42                                     | 0.00755                       | 0.374                                                    | 0.0575                                                | 0.24849                                                                           | -28.80                                      | -7.62                                                                                           | -2.91                                                                  | 18.27                                                               |
| <i>Ctu1</i>           | 59.18             | 64.95                                       | 59.03           | 46.69                                     | 0.4933                        | 0.1007                                                   | 0.15062                                               | 0.0355                                                                            | -0.15                                       | -18.26                                                                                          | 5.77                                                                   | -12.34                                                              |
| <i>Ctu2</i>           | 143.27            | 111.51                                      | 92.14           | 116.24                                    | 0.07533                       | 0.14326                                                  | 0.18422                                               | 0.41275                                                                           | -51.14                                      | 4.73                                                                                            | -31.76                                                                 | 24.11                                                               |
| <i>Dus2</i>           | 88.19             | 105.12                                      | 119.38          | 101.36                                    | 0.10431                       | 0.26561                                                  | 0.07961                                               | 0.41745                                                                           | 31.19                                       | -3.77                                                                                           | 16.93                                                                  | -18.03                                                              |
| <i>Elp1</i>           | 110.06            | 118.77                                      | 130.22          | 189.31                                    | 0.14598                       | 0.30582                                                  | 0.04925                                               | 0.02986                                                                           | 20.15                                       | 70.55                                                                                           | 8.70                                                                   | 59.10                                                               |
| <i>Elp2</i>           | 325.37            | 342.29                                      | 314.51          | 361.74                                    | 0.37353                       | 0.21089                                                  | 0.11272                                               | 0.20728                                                                           | -10.86                                      | 19.46                                                                                           | 16.91                                                                  | 47.23                                                               |
| <i>Elp3</i>           | 304.85            | 301.35                                      | 290.18          | 297.63                                    | 0.28651                       | 0.3805                                                   | 0.43521                                               | 0.4625                                                                            | -14.66                                      | -3.72                                                                                           | -3.50                                                                  | 7.45                                                                |
| <i>Elp4</i>           | 99.38             | 111.68                                      | 88.78           | 75.55                                     | 0.31457                       | 0.31008                                                  | 0.13255                                               | 0.03532                                                                           | -10.60                                      | -36.13                                                                                          | 12.30                                                                  | -13.23                                                              |
| <i>Elp5</i>           | 269.38            | 233.06                                      | 224.48          | 203.21                                    | 0.19405                       | 0.10719                                                  | 0.31927                                               | 0.0548                                                                            | -44.89                                      | -29.85                                                                                          | -36.32                                                                 | -21.28                                                              |
| <i>Elp6</i>           | 69.04             | 46.65                                       | 71.10           | 43.73                                     | 0.46117                       | 0.17065                                                  | 0.05585                                               | 0.42666                                                                           | 2.06                                        | -2.92                                                                                           | -22.40                                                                 | -27.37                                                              |
| <i>Fto</i>            | 413.52            | 390.51                                      | 383.12          | 367.09                                    | 0.1863                        | 0.24778                                                  | 0.35434                                               | 0.2959                                                                            | -30.40                                      | -23.42                                                                                          | -23.01                                                                 | -16.03                                                              |
| <i>Ftsj</i>           | 232.76            | 208.72                                      | 199.45          | 163.81                                    | 0.24157                       | 0.21426                                                  | 0.20631                                               | 0.04516                                                                           | -33.30                                      | -44.91                                                                                          | -24.04                                                                 | -35.65                                                              |
| <i>Gtpbp3</i>         | 77.68             | 93.87                                       | 127.22          | 128.61                                    | 0.01746                       | 0.07273                                                  | 0.4676                                                | 0.01053                                                                           | 49.55                                       | 34.74                                                                                           | 16.20                                                                  | 1.39                                                                |
| <i>Lcmt2</i>          | 103.47            | 84.42                                       | 118.72          | 88.80                                     | 0.12429                       | 0.05285                                                  | 0.03798                                               | 0.35122                                                                           | 15.24                                       | 4.38                                                                                            | -19.05                                                                 | -29.91                                                              |
| <i>Mettl1</i>         | 203.79            | 129.68                                      | 154.39          | 137.72                                    | 0.28002                       | 0.13156                                                  | 0.39856                                               | 0.39913                                                                           | -49.40                                      | 8.04                                                                                            | -74.11                                                                 | -16.66                                                              |
| <i>Mettl2</i>         | 84.69             | 92.55                                       | 87.78           | 84.27                                     | 0.37661                       | 0.05017                                                  | 0.36447                                               | 0.06418                                                                           | 3.09                                        | -8.28                                                                                           | 7.85                                                                   | -3.51                                                               |
| <i>Mettl3</i>         | 66.29             | 70.89                                       | 55.52           | 63.39                                     | 0.15684                       | 0.27013                                                  | 0.21433                                               | 0.15058                                                                           | -10.76                                      | -7.50                                                                                           | 4.61                                                                   | 7.87                                                                |
| <i>Mettl4</i>         | 106.43            | 155.03                                      | 158.59          | 132.28                                    | 0.0166                        | 0.00132                                                  | 0.16838                                               | 0.15064                                                                           | 52.16                                       | -22.76                                                                                          | 48.60                                                                  | -26.32                                                              |

|                 |          |         |         |         |         |         |         |         |          |          |          |          |
|-----------------|----------|---------|---------|---------|---------|---------|---------|---------|----------|----------|----------|----------|
| <b>Mettl5</b>   | 118.34   | 136.94  | 100.12  | 112.50  | 0.1003  | 0.10149 | 0.09291 | 0.02085 | -18.21   | -24.44   | 18.60    | 12.38    |
| <b>Mettl6</b>   | 147.33   | 128.24  | 115.69  | 145.65  | 0.03535 | 0.08898 | 0.0072  | 0.01032 | -31.63   | 17.41    | -19.09   | 29.95    |
| <b>Mettl7a</b>  | 2870.64  | 2920.69 | 3248.80 | 2055.12 | 0.29183 | 0.45992 | 0.06752 | 0.07031 | 378.16   | -865.58  | 50.05    | -1193.69 |
| <b>Mettl7b</b>  | 10592.57 | 6944.21 | 8639.57 | 3520.68 | 0.15229 | 0.00461 | 0.0409  | 0.05381 | -1953.00 | -3423.53 | -3648.36 | -5118.89 |
| <b>Mettl8</b>   | 139.37   | 145.35  | 140.80  | 91.27   | 0.46341 | 0.27833 | 0.07667 | 0.05218 | 1.43     | -54.09   | 5.98     | -49.53   |
| <b>Mettl9</b>   | 550.19   | 516.06  | 479.71  | 479.98  | 0.08811 | 0.19757 | 0.49877 | 0.33681 | -70.48   | -36.08   | -34.13   | 0.27     |
| <b>Mettl14</b>  | 62.43    | 69.90   | 59.79   | 75.30   | 0.36533 | 0.25572 | 0.11849 | 0.35455 | -2.64    | 5.40     | 7.48     | 15.51    |
| <b>Mettl15</b>  | 19.82    | 37.34   | 35.27   | 51.22   | 0.06461 | 0.01622 | 0.07118 | 0.04764 | 15.44    | 13.88    | 17.52    | 15.96    |
| <b>Mettl16</b>  | 161.87   | 171.95  | 197.76  | 146.28  | 0.01825 | 0.29355 | 0.06712 | 0.22161 | 35.89    | -25.67   | 10.08    | -51.48   |
| <b>Mettl17</b>  | 123.08   | 135.74  | 159.27  | 113.11  | 0.01793 | 0.14895 | 0.05417 | 0.17967 | 36.19    | -22.63   | 12.66    | -46.16   |
| <b>Mettl18</b>  | 37.42    | 24.97   | 37.05   | 36.95   | 0.46264 | 0.01138 | 0.49434 | 0.0752  | -0.37    | 11.97    | -12.45   | -0.10    |
| <b>Mettl21a</b> | 81.33    | 85.59   | 101.19  | 110.50  | 0.01282 | 0.12383 | 0.15139 | 0.0082  | 19.86    | 24.91    | 4.26     | 9.31     |
| <b>Mettl21c</b> | 1.31     | 1.12    | 1.13    | 1.00    | 0.41118 | 0.36357 | 0.42827 | 0.38964 | -0.18    | -0.12    | -0.19    | -0.13    |
| <b>Mettl22</b>  | 144.07   | 94.70   | 91.14   | 60.20   | 0.07132 | 0.04983 | 0.10819 | 0.02067 | -52.93   | -34.51   | -49.36   | -30.94   |
| <b>Mettl23</b>  | 230.61   | 178.61  | 223.27  | 127.46  | 0.4608  | 0.17554 | 0.09191 | 0.09823 | -7.34    | -51.15   | -52.00   | -95.81   |
| <b>Mettl24</b>  | 1.93     | 0.50    | 2.06    | 1.80    | 0.45367 | 0.08876 | 0.37217 | 0.02546 | 0.13     | 1.30     | -1.43    | -0.26    |
| <b>Mettl25</b>  | 27.95    | 22.04   | 14.08   | 20.85   | 0.03402 | 0.14029 | 0.0699  | 0.30827 | -13.88   | -1.19    | -5.91    | 6.77     |
| <b>Mettl26</b>  | 2360.65  | 1646.13 | 1154.60 | 527.87  | 0.02172 | 0.0574  | 0.04817 | 0.0024  | -1206.06 | -1118.26 | -714.53  | -626.73  |
| <b>Mettl27</b>  | 127.33   | 138.04  | 159.16  | 115.41  | 0.16902 | 0.34275 | 0.13318 | 0.24583 | 31.82    | -22.63   | 10.70    | -43.75   |
| <b>Mrm1</b>     | 44.76    | 29.41   | 27.49   | 33.11   | 0.02882 | 0.01161 | 0.2796  | 0.31969 | -17.26   | 3.70     | -15.35   | 5.61     |
| <b>Mrm2</b>     | 116.37   | 83.06   | 112.92  | 62.56   | 0.46134 | 0.08474 | 0.08852 | 0.1239  | -3.45    | -20.50   | -33.31   | -50.36   |
| <b>Mrm3</b>     | 95.96    | 89.59   | 81.39   | 64.88   | 0.19694 | 0.33215 | 0.10529 | 0.02338 | -14.57   | -24.72   | -6.37    | -16.52   |
| <b>Mto1</b>     | 176.24   | 204.54  | 142.39  | 115.38  | 0.02327 | 0.03939 | 0.04366 | 0.00092 | -33.85   | -89.16   | 28.30    | -27.02   |
| <b>Nat10</b>    | 170.18   | 201.57  | 175.69  | 245.04  | 0.37333 | 0.02541 | 0.00938 | 0.01922 | 5.52     | 43.47    | 31.39    | 69.35    |
| <b>Nsun2</b>    | 917.83   | 927.88  | 702.01  | 817.25  | 0.03412 | 0.45256 | 0.18573 | 0.18318 | -215.82  | -110.63  | 10.05    | 115.24   |
| <b>Nsun3</b>    | 108.87   | 144.98  | 119.67  | 125.89  | 0.32017 | 0.0517  | 0.36873 | 0.0885  | 10.81    | -19.09   | 36.11    | 6.22     |
| <b>Nsun4</b>    | 242.17   | 218.69  | 183.43  | 140.94  | 0.00379 | 0.08839 | 0.05045 | 0.01138 | -58.74   | -77.76   | -23.47   | -42.49   |
| <b>Osgepl1</b>  | 122.29   | 127.99  | 119.15  | 113.54  | 0.43918 | 0.30001 | 0.39344 | 0.11881 | -3.13    | -14.45   | 5.70     | -5.61    |
| <b>Pus1</b>     | 207.13   | 168.55  | 183.54  | 153.50  | 0.26833 | 0.05879 | 0.21007 | 0.20756 | -23.60   | -15.05   | -38.59   | -30.04   |
| <b>Qrt1</b>     | 43.82    | 35.84   | 46.47   | 44.53   | 0.42115 | 0.26256 | 0.43654 | 0.22411 | 2.65     | 8.69     | -7.99    | -1.95    |
| <b>Qrt2</b>     | 49.80    | 60.79   | 37.74   | 73.04   | 0.15201 | 0.20697 | 0.0186  | 0.20232 | -12.06   | 12.24    | 11.00    | 35.30    |
| <b>Tarbp1</b>   | 41.44    | 66.44   | 40.93   | 66.71   | 0.48452 | 0.03032 | 0.02725 | 0.48116 | -0.51    | 0.28     | 25.00    | 25.79    |
| <b>Thumpd1</b>  | 227.25   | 230.09  | 230.30  | 269.92  | 0.44034 | 0.45497 | 0.07394 | 0.10112 | 3.05     | 39.82    | 2.84     | 39.61    |
| <b>Trdmt1</b>   | 11.96    | 23.45   | 28.91   | 32.85   | 0.00518 | 0.01077 | 0.22076 | 0.04353 | 16.95    | 9.40     | 11.49    | 3.94     |
| <b>Trit1</b>    | 174.82   | 158.85  | 142.30  | 114.92  | 0.12494 | 0.24201 | 0.1117  | 0.01889 | -32.51   | -43.93   | -15.96   | -27.38   |
| <b>Trmo</b>     | 40.67    | 35.51   | 22.83   | 23.55   | 0.06921 | 0.30405 | 0.41931 | 0.00192 | -17.84   | -11.96   | -5.16    | 0.72     |
| <b>Trmt1l</b>   | 212.92   | 248.96  | 239.71  | 189.76  | 0.04962 | 0.03073 | 0.00633 | 0.00543 | 26.80    | -59.20   | 36.04    | -49.96   |

|                |        |         |         |         |         |         |         |         |        |        |        |        |
|----------------|--------|---------|---------|---------|---------|---------|---------|---------|--------|--------|--------|--------|
| <b>Trmt2a</b>  | 132.89 | 148.63  | 143.77  | 207.62  | 0.27882 | 0.17184 | 0.03717 | 0.03948 | 10.88  | 58.99  | 15.74  | 63.85  |
| <b>Trmt5</b>   | 62.21  | 77.99   | 58.25   | 73.23   | 0.34699 | 0.09043 | 0.15385 | 0.36724 | -3.97  | -4.76  | 15.78  | 14.98  |
| <b>Trmt6</b>   | 165.95 | 145.60  | 142.59  | 227.47  | 0.23101 | 0.22666 | 0.08884 | 0.08759 | -23.36 | 81.86  | -20.35 | 84.88  |
| <b>Trmt9b</b>  | 39.57  | 78.90   | 49.31   | 13.20   | 0.14461 | 0.06525 | 0.00397 | 0.01633 | 9.74   | -65.70 | 39.33  | -36.11 |
| <b>Trmt10a</b> | 48.85  | 64.08   | 63.78   | 57.23   | 0.06272 | 0.08796 | 0.33027 | 0.3332  | 14.93  | -6.85  | 15.23  | -6.55  |
| <b>Trmt10b</b> | 62.21  | 77.99   | 58.25   | 73.23   | 0.34699 | 0.09043 | 0.15385 | 0.36724 | -3.97  | -4.76  | 15.78  | 14.98  |
| <b>Trmt10c</b> | 212.30 | 220.26  | 133.66  | 183.68  | 0.00048 | 0.16597 | 0.00876 | 0.01726 | -78.64 | -36.58 | 7.96   | 50.02  |
| <b>Trmt11</b>  | 61.24  | 65.98   | 45.32   | 59.65   | 0.02883 | 0.24307 | 0.05141 | 0.20616 | -15.93 | -6.34  | 4.74   | 14.33  |
| <b>Trmt12</b>  | 34.34  | 47.12   | 77.26   | 57.32   | 0.01088 | 0.00882 | 0.09919 | 0.09165 | 42.92  | 10.19  | 12.79  | -19.94 |
| <b>Trmt13</b>  | 19.77  | 23.22   | 16.93   | 35.51   | 0.08531 | 0.26766 | 0.05227 | 0.14496 | -2.84  | 12.30  | 3.44   | 18.58  |
| <b>Trmt61a</b> | 51.37  | 42.51   | 31.85   | 68.43   | 0.04394 | 0.14339 | 0.06035 | 0.11128 | -19.52 | 25.92  | -8.86  | 36.58  |
| <b>Trmt61b</b> | 15.03  | 24.19   | 15.49   | 26.56   | 0.44874 | 0.09342 | 0.03759 | 0.36848 | 0.47   | 2.36   | 9.16   | 11.06  |
| <b>Trmt112</b> | 221.23 | 155.83  | 159.95  | 103.52  | 0.08408 | 0.03662 | 0.04213 | 7.5E-05 | -61.28 | -52.31 | -65.40 | -56.43 |
| <b>Trmu</b>    | 109.05 | 90.53   | 101.58  | 119.12  | 0.41799 | 0.23967 | 0.27837 | 0.04694 | -7.47  | 28.59  | -18.52 | 17.54  |
| <b>Trub2</b>   | 64.75  | 88.24   | 74.50   | 107.28  | 0.18471 | 0.02612 | 0.15452 | 0.2657  | 9.74   | 19.03  | 23.49  | 32.78  |
| <b>Wdr4</b>    | 115.22 | 126.66  | 146.18  | 148.54  | 0.14345 | 0.27899 | 0.47111 | 0.21489 | 30.96  | 21.88  | 11.44  | 2.36   |
| <b>Wdr6</b>    | 154.79 | 159.57  | 92.77   | 117.53  | 0.13695 | 0.45901 | 0.21332 | 0.03492 | -62.02 | -42.05 | 4.78   | 24.76  |
| <b>Yrdc</b>    | 171.49 | 137.899 | 92.0617 | 185.071 | 0.00533 | 0.07057 | 0.09653 | 0.23695 | -79.43 | 47.17  | -33.60 | 93.01  |



## Supplemental Figure Legends

**Figure S1. Transcripts regulated in *Alkbh8<sup>Def</sup>* Saline vs. WT Saline mice in the 6 hour APAP experiment.** (A) Enhanced volcano plots were generated for *Alkbh8<sup>Def</sup>* saline verse WT saline and (B) Metascape analysis were performed for  $\log_2FC > 2.0$  and transcripts regulated were identified.

**Figure S2. Selenoproteins measured after 6 hour APAP exposure.** GPX4, TRXR1 and SELS protein levels in the liver were evaluated using the ProteinSimple WES system. Statistical significance of biological replicates (N = 3) was measured by an unpaired t-test with (\* $p < 0.05$ , \*\* $p < 0.01$ , \*\*\* $p < 0.001$ ).

**Figure S3. Remainder of measured epitranscriptomic marks in mouse liver tissue after APAP (6 hours).** WT and *Alkbh8<sup>Def</sup>* mice (N = 3) were exposed to a single 600 mg/kg dose of APAP and livers were harvested 6 hours after dosing. Modifications were measured using LC-MS/MS. Statistical significance of biological replicates (N = 3) was measured by an unpaired t-test with (\* $p < 0.05$ , \*\* $p < 0.01$ , \*\*\* $p < 0.001$ ).

**Figure S4. Transcripts regulated in *Alkbh8<sup>Def</sup>* Saline verse WT Saline mice in the 4 day APAP experiment.** (A) Enhanced volcano plots were generated for *Alkbh8<sup>Def</sup>* saline verse WT saline and (B) Metascape analysis were performed for  $\log_2FC > 2.0$  and transcripts regulated were identified.

**Figure S5. Transcripts regulated in *Alkbh8<sup>Def</sup>* APAP verse WT APAP in the 4 day experiment.** Wildtype and *Alkbh8<sup>Def</sup>* mice (N = 3) were exposed to daily doses of 600 mg/kg APAP over 4 days and tissue was harvested 24 hours after the fourth dose was administered and RNA was purified for analysis by mRNA-seq. (A) Enhanced volcano plots were generated for

*Alkbh8*<sup>Def</sup> APAP verse WT APAP and **(B)** Metascape analysis were performed for log<sub>2</sub>FC > 2.0 and transcripts regulated were identified.

**Figure S6. Selenoprotein S expression elevated in *Alkbh8*<sup>Def</sup> liver tissue after 4 day APAP exposure.** SELS expression was evaluated using the ProteinSimple WES system. Statistical significance of biological replicates (N = 3) was determined using an unpaired t-test with (\*p < 0.05, \*\*p < 0.01, \*\*\* p < 0.001).

**Figure S7. tRNA modifications measured after 4 day APAP exposure. (A)** WT and *Alkbh8*<sup>Def</sup> mice (N=3) were exposed to a daily 600 mg/kg dose of APAP and livers were harvested 4 days after dosing. **(B)** Individual bar graphs showing average concentrations of various tRNA chemical modifications measured using LC-MS/MS. Statistical significance of biological replicates (N = 3) were measured by an unpaired t-test with (\*p < 0.05, \*\*p < 0.01, \*\*\* p < 0.001).

Supplemental Figure S1.

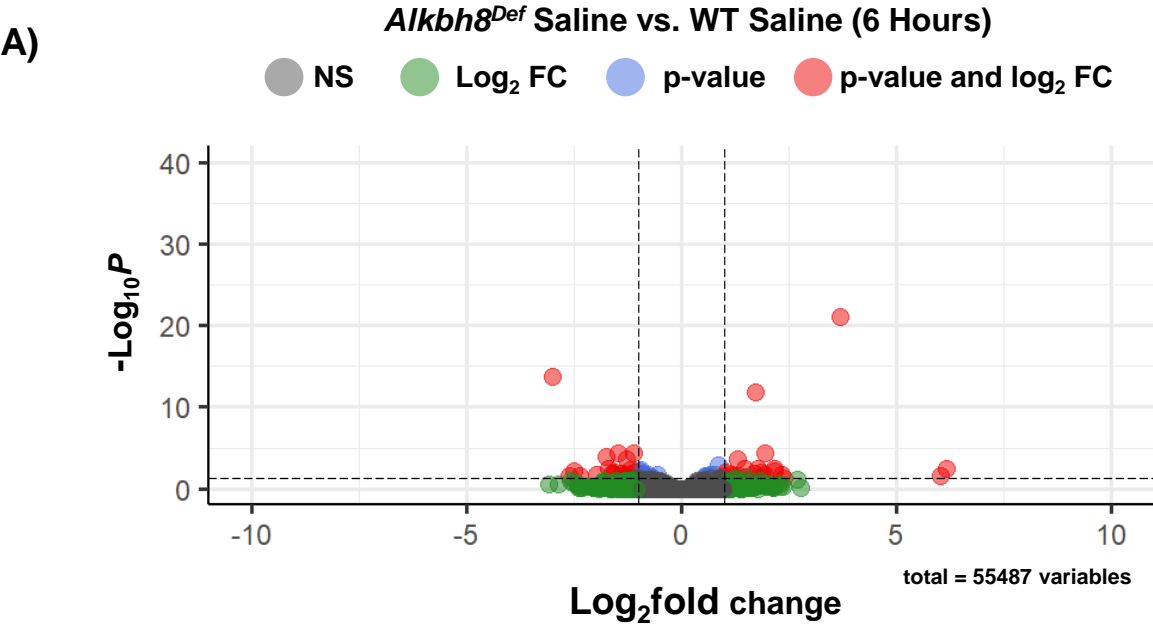

B)

## Upregulated

| Ensembl ID         | Gene Symbol | Description                                                                    | Biological Process (GO)                                                                                                                                                                                                    |
|--------------------|-------------|--------------------------------------------------------------------------------|----------------------------------------------------------------------------------------------------------------------------------------------------------------------------------------------------------------------------|
| ENSMUSG00000038754 | Elovl3      | elongation of very long chain fatty acids (FEN1/Elo2, SUR4/Elo3, yeast)-like 3 | GO:0019367 fatty acid elongation, saturated fatty acid;GO:0019368 fatty acid elongation, unsaturated fatty acid;GO:0034625 fatty acid elongation, monounsaturated fatty acid                                               |
| ENSMUSG00000025229 | Pitx3       | paired-like homeodomain transcription factor 3                                 | GO:1904935 positive regulation of cell proliferation in midbrain;GO:1904933 regulation of cell proliferation in midbrain;GO:0033278 cell proliferation in midbrain                                                         |
| ENSMUSG00000037583 | Nr0b2       | nuclear receptor subfamily 0, group B, member 2                                | GO:0032922 circadian regulation of gene expression;GO:0032024 positive regulation of insulin secretion;GO:0090277 positive regulation of peptide hormone secretion                                                         |
| ENSMUSG00000044646 | Zbtb7c      | zinc finger and BTB domain containing 7C                                       | GO:1903025 regulation of RNA polymerase II regulatory region sequence-specific DNA binding;GO:2000677 regulation of transcription regulatory region DNA binding;GO:0045600 positive regulation of fat cell differentiation |
| ENSMUSG00000026077 | Npas2       | neuronal PAS domain protein 2                                                  | GO:1903367 positive regulation of fear response;GO:2000987 positive regulation of behavioral fear response;GO:0051775 response to redox state                                                                              |
| ENSMUSG00000038508 | Gdf15       | growth differentiation factor 15                                               | GO:0060400 negative regulation of growth hormone receptor signaling pathway;GO:0060398 regulation of growth hormone receptor signaling pathway;GO:0002023 reduction of food intake in response to dietary excess           |

## Downregulated

| Ensembl ID         | Gene Symbol | Description                                            | Biological Process (GO)                                                                                                                                     |
|--------------------|-------------|--------------------------------------------------------|-------------------------------------------------------------------------------------------------------------------------------------------------------------|
| ENSMUSG00000066687 | Zbtb16      | zinc finger and BTB domain containing 16               | GO:0048133 male germ-line stem cell asymmetric division;GO:0051138 positive regulation of NK T cell differentiation;GO:0042078 germ-line stem cell division |
| ENSMUSG00000048794 | Cfap100     | cilia and flagella associated protein 100              | GO:0008150 biological_process                                                                                                                               |
| ENSMUSG00000091898 | Tnnc1       | troponin C, cardiac/slow skeletal                      | GO:0032972 regulation of muscle filament sliding speed;GO:0002086 diaphragm contraction;GO:0003011 involuntary skeletal muscle contraction                  |
| ENSMUSG00000024365 | Cyp21a1     | cytochrome P450, family 21, subfamily a, polypeptide 1 | GO:0006705 mineralocorticoid biosynthetic process;GO:0008212 mineralocorticoid metabolic process;GO:0006704 glucocorticoid biosynthetic process             |

Supplemental Figure S2.

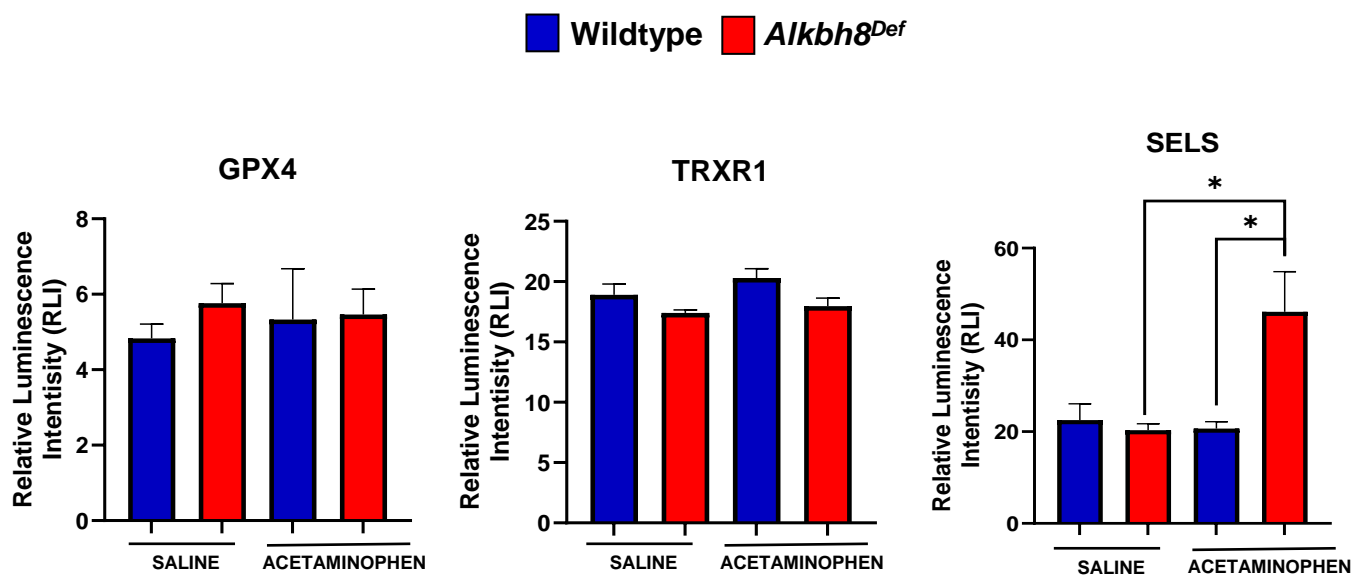

Supplemental Figure S3.

Wildtype *Alkbh8<sup>Def</sup>*

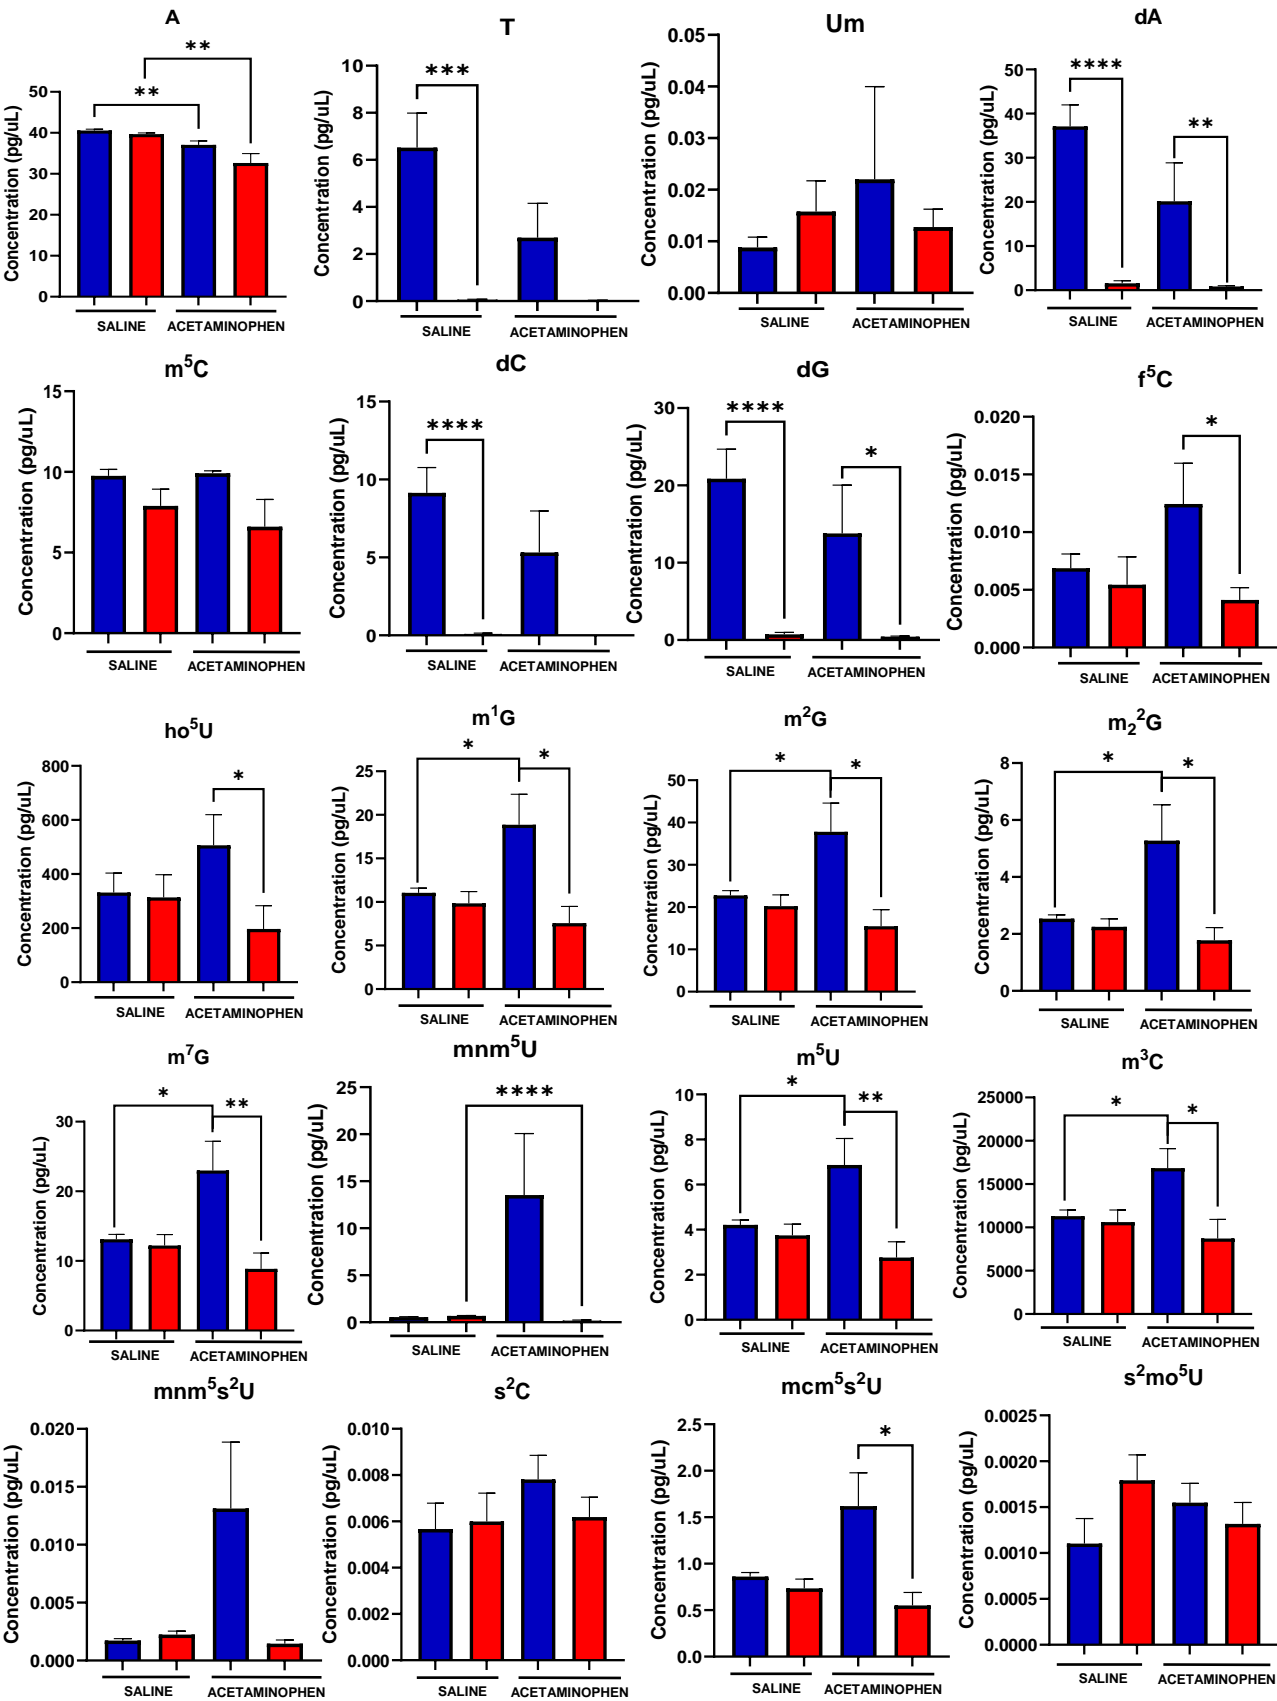

Supplemental Figure S4.

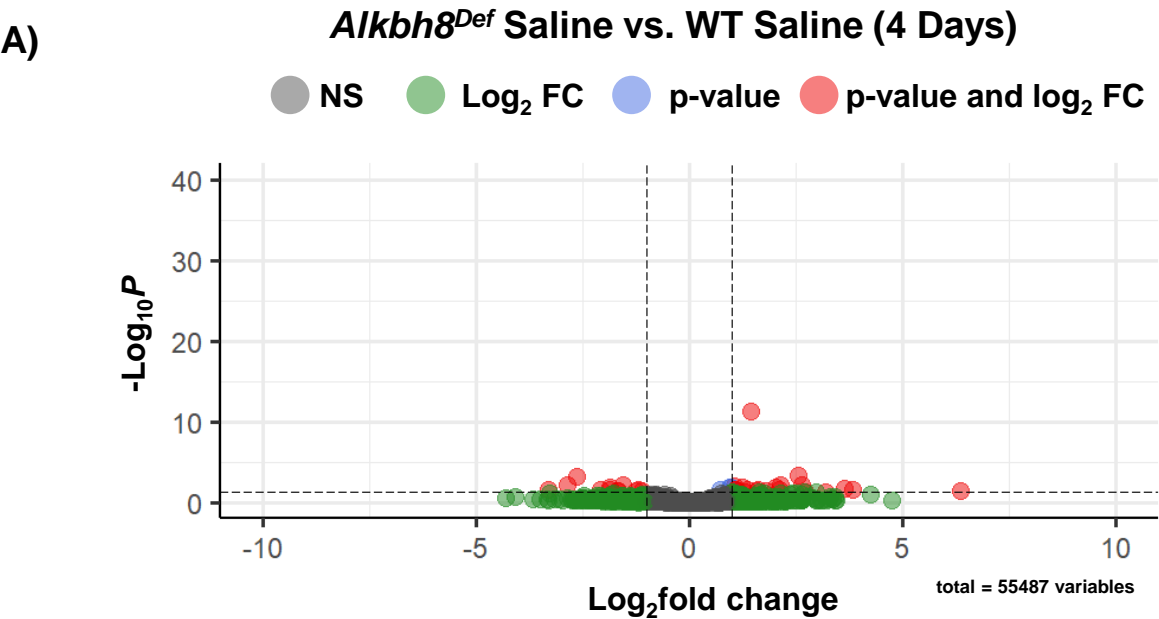

B) Upregulated

| Ensembl ID         | Gene Symbol | Description                                                           | Biological Process (GO)                                                                                                                                                        |
|--------------------|-------------|-----------------------------------------------------------------------|--------------------------------------------------------------------------------------------------------------------------------------------------------------------------------|
| ENSMUSG00000035498 | Cdcp1       | CUB domain containing protein 1                                       | GO:0008150 biological_process                                                                                                                                                  |
| ENSMUSG00000022351 | Sqle        | squalene epoxidase                                                    | GO:0140042 lipid droplet formation;GO:0034389 lipid droplet organization;GO:0016126 sterol biosynthetic process                                                                |
| ENSMUSG00000041782 | Lad1        | ladinin                                                               |                                                                                                                                                                                |
| ENSMUSG00000025229 | Pitx3       | paired-like homeodomain transcription factor 3                        | GO:1904935 positive regulation of cell proliferation in midbrain;GO:1904933 regulation of cell proliferation in midbrain;GO:0033278 cell proliferation in midbrain             |
| ENSMUSG00000024036 | Slc37a1     | solute carrier family 37 (glycerol-3-phosphate transporter), member 1 | GO:0015712 hexose phosphate transport;GO:0015760 glucose-6-phosphate transport;GO:0035435 phosphate ion transmembrane transport                                                |
| ENSMUSG00000026077 | Npas2       | neuronal PAS domain protein 2                                         | GO:1903367 positive regulation of fear response;GO:2000987 positive regulation of behavioral fear response;GO:0051775 response to redox state                                  |
| ENSMUSG00000025185 | Loxl4       | lysyl oxidase-like 4                                                  | GO:0018057 peptidyl-lysine oxidation;GO:0018158 protein oxidation;GO:0030199 collagen fibril organization                                                                      |
| ENSMUSG00000023067 | Cdkn1a      | cyclin-dependent kinase inhibitor 1A (P21)                            | GO:1905178 regulation of cardiac muscle tissue regeneration;GO:1905179 negative regulation of cardiac muscle tissue regeneration;GO:0061026 cardiac muscle tissue regeneration |

Downregulated

| Ensembl ID         | Gene Symbol | Description                             | Biological Process (GO)                                                                                                                                                                             |
|--------------------|-------------|-----------------------------------------|-----------------------------------------------------------------------------------------------------------------------------------------------------------------------------------------------------|
| ENSMUSG00000059060 | Rad51b      | RAD51 paralogue B                       | GO:0010971 positive regulation of G2/M transition of mitotic cell cycle;GO:1902751 positive regulation of cell cycle G2/M phase transition;GO:0001832 blastocyst growth                             |
| ENSMUSG00000038060 | Dlec1       | deleted in lung and esophageal cancer 1 | GO:0008285 negative regulation of cell proliferation;GO:0042127 regulation of cell proliferation;GO:0008283 cell proliferation                                                                      |
| ENSMUSG00000022528 | Hes1        | hes family bHLH transcription factor 1  | GO:0061105 regulation of stomach neuroendocrine cell differentiation;GO:0061106 negative regulation of stomach neuroendocrine cell differentiation;GO:1905933 regulation of cell fate determination |

Supplemental Figure S5.

*Alkbh8<sup>Def</sup>* APAP vs. WT APAP (4 Days)

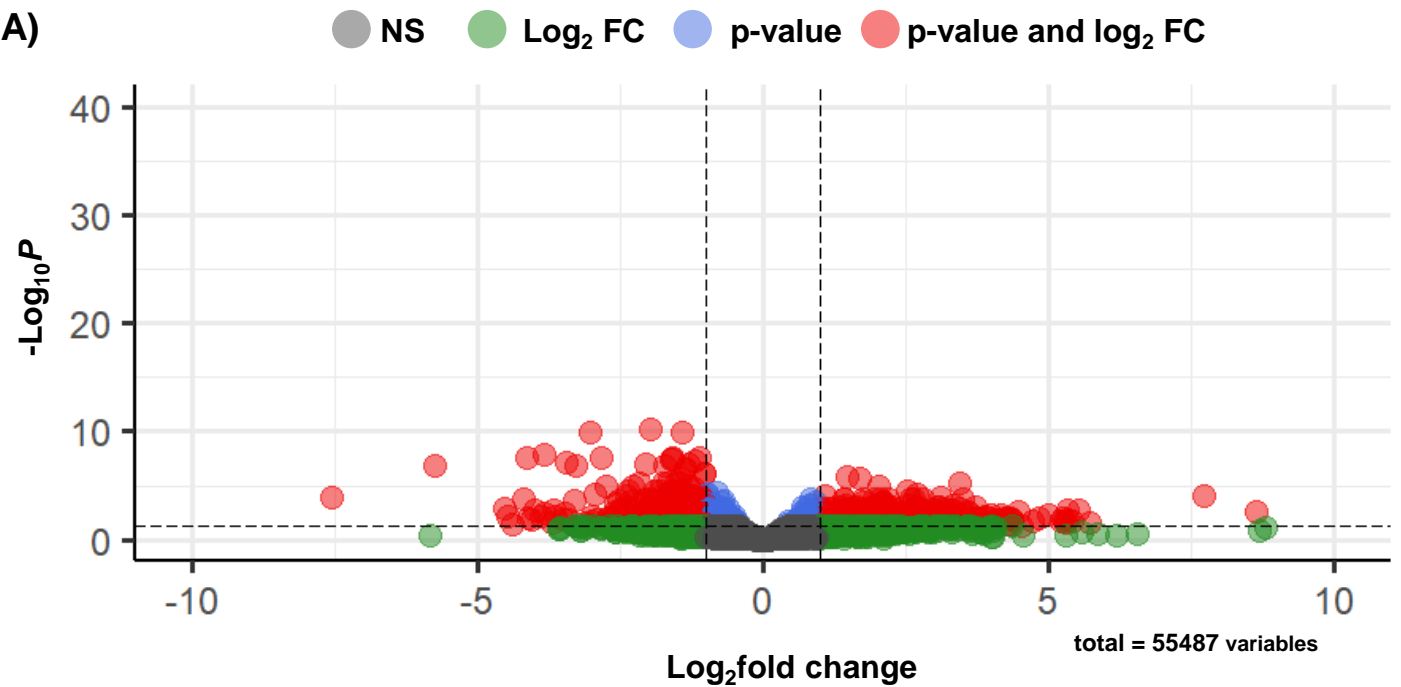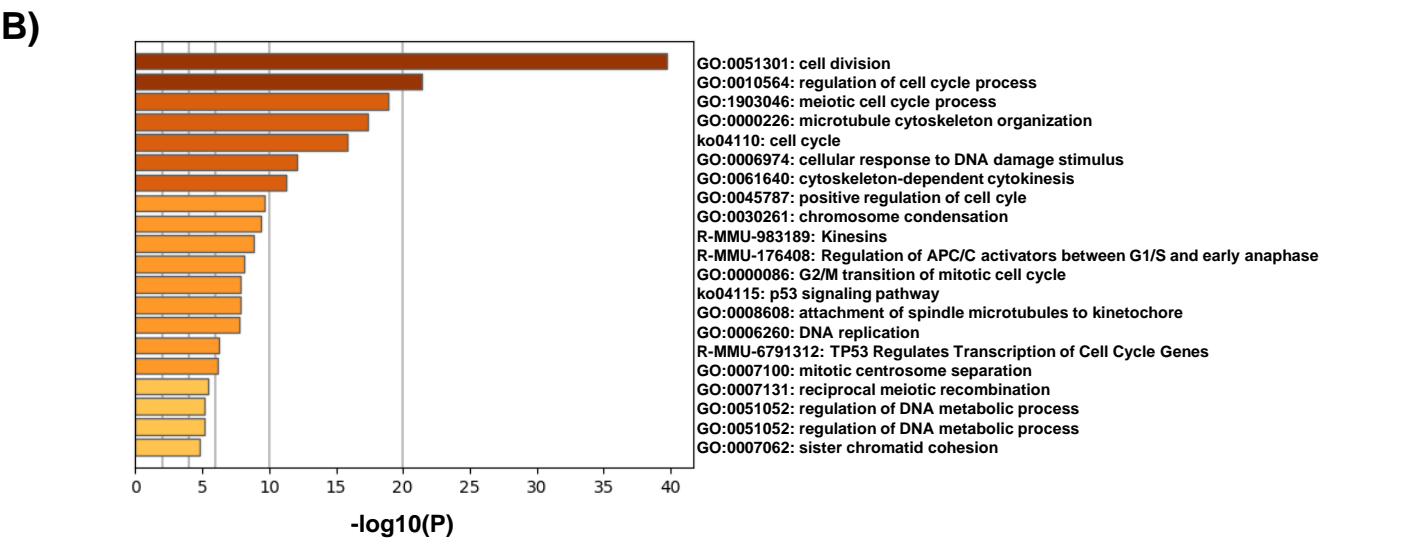

Supplemental Figure S6.

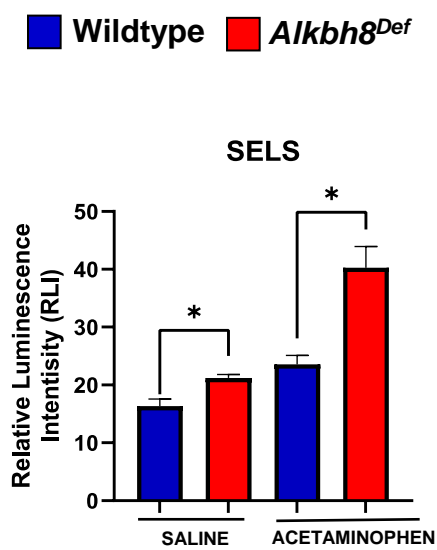



Supplemental Figure S7.

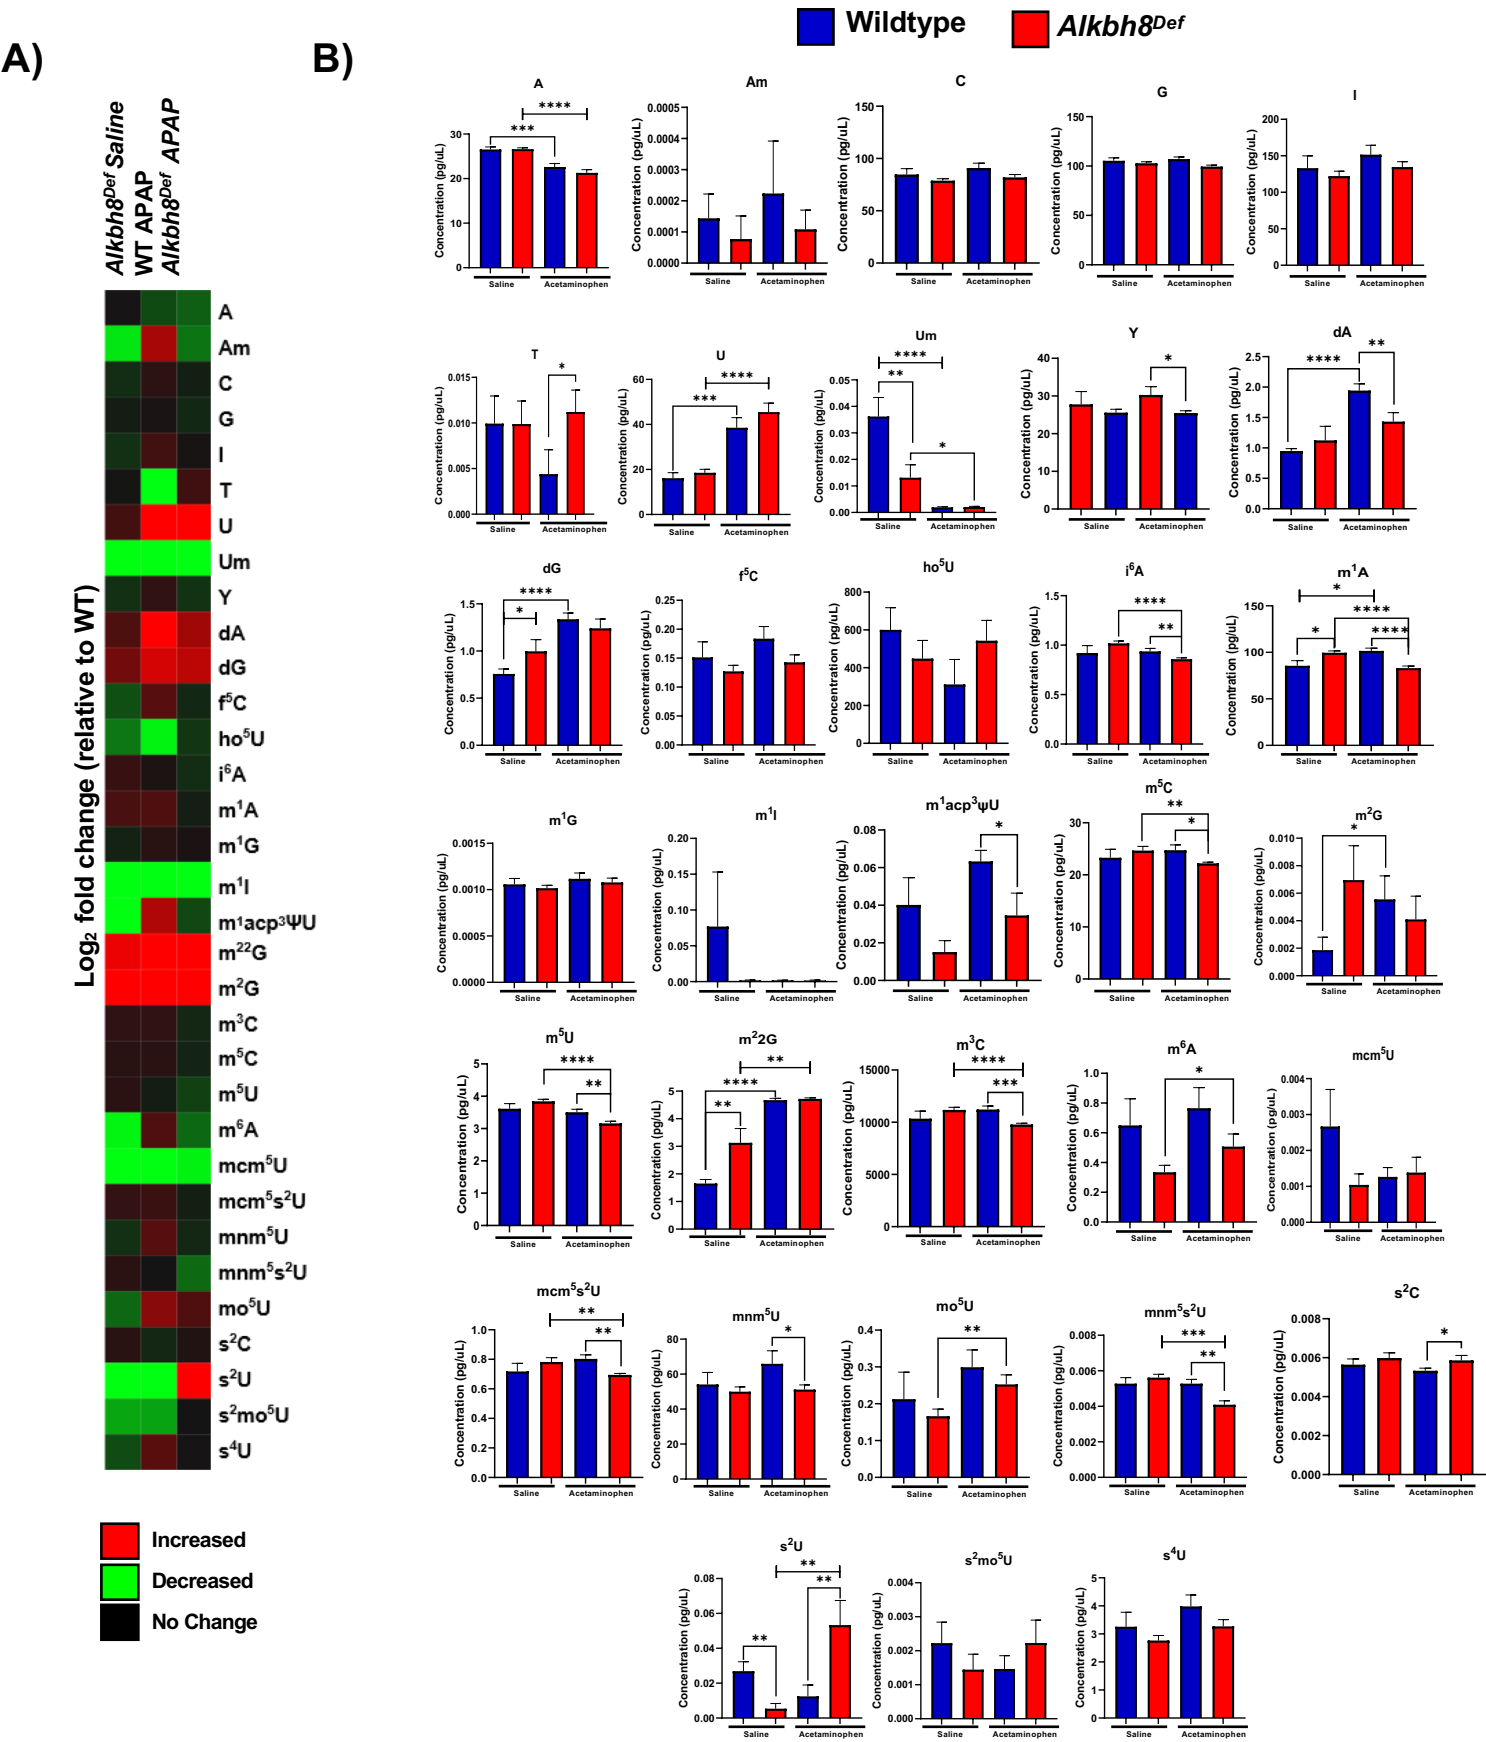

Supplement: s1 [file s1]
